1 **The genetic architecture of fruit colour in strawberry (*Fragaria x ananassa*) uncovers the predominant**  
2 **contribution of the *F. vesca* subgenome to anthocyanins and reveals underlying genetic variations**

3 Marc Labadie<sup>1§</sup>, Guillaume Vallin<sup>1§</sup>, Aurélie Petit<sup>1,2</sup>, Ludwig Ring<sup>3</sup>, Thomas Hoffmann<sup>3</sup>, Amélia Gaston<sup>1</sup>,  
4 Aline Potier<sup>1</sup>, Juan Munoz-Blanco<sup>4</sup>, José L. Caballero<sup>4</sup>, Wilfried Schwab<sup>3</sup>, Christophe Rothan<sup>1\*</sup>, Béatrice  
5 Denoyes<sup>1\*</sup>

6 <sup>1</sup> INRAE, Univ. Bordeaux, UMR BFP, F-33140, Villenave d'Ornon, France.

7 <sup>2</sup> Invenio, MIN de Brienne, 110 quai de Paludate, 33000 Bordeaux, France

8 <sup>3</sup> Biotechnology of Natural Products, Technical University Munich, Liesel-Beckmann-Str. 1, 85354  
9 Freising, Germany

10 <sup>4</sup> Departamento de Bioquímica y Biología Molecular, Campus de Excelencia Internacional  
11 Agroalimentario ceiA3, Universidad de Córdoba, Córdoba, Spain.

12  
13 § These authors contributed equally to this work

14 \* Corresponding authors:

15 **Béatrice Denoyes**

16 <https://orcid.org/0000-0002-0369-9609>

17 Email: [beatrice.denoyes@inrae.fr](mailto:beatrice.denoyes@inrae.fr)

18 UMR BFP – INRAE

19 71 avenue Edouard Bourlaux

20 33140 Villenave d'Ornon, France

21 Phone: +335 57 12 24 60

22 **Christophe Rothan**

23 <https://orcid.org/0000-0002-6831-2823>

24 Email: [christophe.rothan@inrae.fr](mailto:christophe.rothan@inrae.fr)

25 UMR BFP – INRAE

26 71 avenue Edouard Bourlaux

27 33140 Villenave d'Ornon, France

28 Phone: +335 57 12 25 32

29  
30 **Author contribution statement:** BD conceived and designed the experiments. AuP conducted hands-on  
31 experiments and data collection. AuP, AIP and AG participated in the data collection. JMB and JLC  
32 designed the microarray. LR, TH and WS generated LC-LS data. ML, GV, CR and BD conducted data  
33 analysis and performed statistical analysis. CR wrote the original draft. All authors read and approved  
34 the final manuscript.

36 **Conflict of interest:** the corresponding authors state that there is no conflict of interest.

37 **Key message:** Mapping flavonoid mQTLs for deciphering genetic architecture of fruit colour in cultivated  
38 strawberry enabled the discovery of MYB and ANR homoeoallelic genetic variants (*F. vesca*-derived  
39 subgenome) underlying major anthocyanins mQTLs and colour QTLs.

40

#### 41 **Abstract**

42 Fruit colour, which is central to the sensorial and nutritional quality of the fruit, is a major breeding  
43 target in cultivated strawberry (*Fragaria x ananassa*). Red fruit colour is caused by the accumulation of  
44 anthocyanins, which are water-soluble flavonoids. Here, using pseudo F<sub>1</sub> progeny derived from the cv.  
45 'Capitola' and the advanced line 'CF1116' and taking advantage of the available high density SNP array,  
46 we delineated fruit flavonoids mQTLs (13 compounds: anthocyanin, flavonols and flavan-3-ols) and  
47 colour-related QTLs (total anthocyanins and fruit colour) to narrow genomic regions corresponding to  
48 specific subgenomes of the cultivated strawberry. Findings showed that the overwhelming majority of  
49 the anthocyanin mQTLs and other colour-related QTLs are specific to *F. vesca* subgenome but that other  
50 subgenomes also contribute to colour variations. We then focused on two major homoeo-mQTLs for  
51 pelargonidin-3-glucoside (PgGs) localized on both male and female maps on linkage group LG3a (*F. vesca*  
52 subgenome). Combined high-resolution mapping of PgGs mQTLs and colour QTLs, transcriptome  
53 analysis of selected progeny individuals and whole genome sequencing of the parents led to the  
54 identification of several INDELS in the *cis*-regulatory region of a *MYB102-like ODORANT* gene and of the  
55 deletion of a putative MADS box binding motif in the 5'UTR upstream region of an anthocyanidin  
56 reductase (*ANR*) gene, which likely underlie significant colour variations in strawberry fruit. The  
57 implications of these findings are important for the functional analysis and genetic engineering of  
58 colour-related genes and for the breeding by Marker-Assisted-Selection of new strawberry varieties with  
59 improved colour and health-benefits.

60

61 **Keywords.** *Fragaria* × *ananassa*, flavonoids, mQTL, colour, anthocyanins, *F. vesca* subgenome,  
62 homoeoallele, ANR, MYB-like ODORANT.

63

#### 64 **Word count:**

65 Abstract: 249

66 Introduction: 971

67 Results: 2750

68 Discussion: 2206

69 Experimental procedures: 1049

70 Total: 6978

71

72 **Introduction**

73 Cultivated strawberry (*Fragaria x ananassa*) is the most consumed small fruit worldwide. Since its  
74 creation in the 18<sup>th</sup> century in botanical gardens in Europe by fortuitous hybridization between the two  
75 New World strawberry species *F. chiloensis* and *F. virginiana* (Edger et al. 2019), cultivated strawberry  
76 has been continuously improved to fit the needs of both producers and consumers. Until recently,  
77 strawberry improvement was primarily focused on features of concern to producers including plant and  
78 fruit yield, resistance to strawberry diseases and adaptation to cultural practices. In the last decades,  
79 Quantitative Trait Loci (QTLs) controlling several related traits, among which early or late fruit  
80 harvesting, extension of the production period, modulation of the runnering/flowering trade-off  
81 (Perrotte et al. 2016; Gaston et al. 2020), and resistance to anthracnose and other diseases (Cockerton  
82 et al. 2018; Salinas et al. 2019) have been identified, thereby enabling the design of genetic markers for  
83 strawberry improvement by Marker-Assisted Selection (MAS) (Denoyes et al. 2017).

84  
85 In the recent years, fruit sensorial quality has also become a major target for strawberry breeding  
86 (Mezzetti et al. 2018). Among the sensorial traits to improve is the colour of the fruit. Fruit colour plays  
87 an important role in the attractiveness of the strawberry and is due to the accumulation of the red  
88 pigments anthocyanins, which are water-soluble flavonoids. The flavonoids detected in strawberry fruit  
89 (anthocyanins, flavonols, flavan-3-ols) (Ring et al., 2013; Urrutia et al. 2016; Labadie et al. 2020) are  
90 derived from the phenylpropanoid pathway (Figure 1A). Flavonols and flavan-3-ols are mainly glycosides  
91 of quercetin and kaempferol as well as derivatives of catechin and epicatechin. Anthocyanins are mainly  
92 glycosides of pelargonidin and cyanidin (Hanhineva et al. 2011), the composition of which gives to the  
93 fruit its distinctive colour hue, from bright red (pelargonidin derivatives) to dark red (cyanidin  
94 derivatives). In addition, the anthocyanins are antioxidant molecules with proven dietary health-benefits  
95 (Tulipani et al. 2008, 2009; Winter et al. 2018). They therefore contribute to the nutritional quality of  
96 strawberries (Battino et al. 2009; Giampieri et al. 2014, 2017; Gasparrini et al. 2018; Miller et al. 2019),  
97 which consumers are increasingly taking into account. Studies in mice fed with engineered purple  
98 tomato accumulating high anthocyanin content or with anthocyanin-enriched extract from strawberry  
99 established unambiguously the health protecting effect of flavonoids (Butelli et al. 2008; Winter et al.  
100 2018). Furthermore, different classes of polyphenols including anthocyanins, flavonols and stilbene  
101 were recently shown to act synergistically in protecting against inflammatory gut disease in mice  
102 (Scarano et al. 2018). All this information points to the need for the discovery of genetic variations  
103 underlying the fruit colour traits in strawberry, so that MAS can be applied to improve the sensorial and  
104 nutritional value of strawberry.

105

106 In a previous study aimed at uncovering the genetic architecture of fruit sensorial traits in cultivated  
107 strawberry, we studied a pseudo full-sibling  $F_1$  progeny and identified several fruit colour QTLs by  
108 measuring total anthocyanins with colourimetric assay and by assessing fruit colour through physical  
109 parameters (Lerceteau-Köhler et al. 2012). To get more insights into the genetic control of fruit  
110 flavonoids and colour, we then used LC-ESI-MS (Ring et al. 2013; Haugeneder et al. 2018) to identify  
111 individual flavonoids in this progeny and mapped the corresponding metabolic QTLs (mQTLs) onto  
112 strawberry genetic map using SSR markers (Labadie et al. 2020). This study, which considerably  
113 advanced our insights into the genetic architecture of flavonoids in strawberry, hitherto little-known  
114 (Lerceteau-Köhler et al. 2012; Urrutia et al. 2016), also enabled us to identify genetic markers for  
115 breeding strawberry varieties with improved fruit colour, sweetness and acidity by MAS (Lerceteau-  
116 Köhler et al. 2012; Labadie et al. 2020). However, identifying the genetic variants underlying fruit colour  
117 variations requires much higher map resolution than that provided by SSR, SSCP and AFLP markers as  
118 previously done (Labadie et al. 2020). The octoploid status of cultivated strawberry ( $2n = 8x = 56$ )  
119 renders this task even more difficult; at a single locus, up to eight homoeoalleles located on four linkage  
120 groups (LG) corresponding to the four subgenomes of *F. x ananassa* may control the content in a given  
121 anthocyanin compound. Advances in strawberry genomics recently provided the tools necessary to  
122 achieve this task. The unprecedented resolution offered by the high-density strawberry SNP genotyping  
123 array (Bassil et al., 2015) now permits to narrow down a given mQTL to a small chromosomal region on  
124 a specific LG. In addition, the mapping of genomic sequences of selected genotypes onto the recently  
125 released high quality reference genome from cultivated strawberry (Edger et al. 2019) should now allow  
126 the identification of homoeoallelic variants harbored by specific subgenomes. Combination of both will  
127 likely accelerate the discovery of genetic variants underlying trait variations in strawberry.

128  
129 In this study, using a cross between cv. 'Capitola' and the advanced line 'CF1116' of cultivated  
130 strawberry (Lerceteau-Köhler et al. 2012), we first mapped with SNP markers the flavonoid mQTLs and  
131 the colour-related QTLs previously identified over a two-year study (Labadie et al. 2020). Findings  
132 showed that the overwhelming majority of the anthocyanin mQTLs and the fruit colour QTLs are  
133 harboured by the *F. vesca* subgenome. We then focused on two major homoeo-mQTLs for pelargonidin-  
134 3-glucoside (PgGs) that were localized on linkage group LG3a (*F. vesca* subgenome) on both male and  
135 female maps in 2010 and 2011. Combination of PgGs mQTL mapping, transcriptome analysis of progeny  
136 individuals and whole genome sequencing of the parents led to the identification of homoeoallelic  
137 specific variations in the upstream *cis*-regulatory region of anthocyanidin reductase (*ANR*) gene and in  
138 the coding region of a *MYB* gene, both of which may contribute to the increased accumulation of PgGs  
139 and therefore to the enhanced colour of strawberry fruit. These discoveries are important to further our

140 knowledge of the genes controlling anthocyanin biosynthesis in the fruit and to define the best strategy  
141 for breeding new strawberry varieties with improved colour and health benefits.

142

## 143 **Results**

144

### 145 *Mapping of fruit colour-related traits in strawberry*

146 In order to delineate genomic regions responsible for flavonoid and colour variations in the pseudo  
147 full-sibling F1 progeny derived from a cross between 'Capitola' X 'CF1116' (72 individuals in 2010 and  
148 131 individuals in 2011), we first analyzed by LC-ESI-MS thirteen fruit flavonoid compounds belonging to  
149 three chemical classes (Fig. 1A). As described in Labadie et al. (2020), the flavonoids detected in the fruit  
150 were the flavonols (4 compounds), the flavan-3-ols (4 compounds) and the anthocyanins (5 compounds:  
151 pelargonidin-3-glucoside (PgGs), pelargonidin-3-glucoside-malonate (PgGsM), pelargonidin-3-rutinoside  
152 (PgRs), cyanidin-3-glucoside (CyGs), and (epi)afzelechin-pelargonidin-glucoside (EpPgGs)). We also  
153 measured the total anthocyanin content (ANTHc) by colourimetry. We additionally scored the fruit  
154 colour in 2011 by comparison with a strawberry colour chart (COLOUR trait). For all the traits, except  
155 COLOUR, the trait quantitative values and range in parents and progeny, the broad sense heritability  
156 and the transgression values in the 'Capitola' X 'CF1116' population were reported in Labadie et al.  
157 (2020). The COLOUR values are reported in Supplemental Table 1 and Supplemental Fig. 1. Distributions  
158 of flavonoids and colour-related traits are represented in Figure 1B for 2010 and in Supplemental Fig. 2  
159 for 2011. Continuous variations of the phenotypic values were observed in the progeny for all the traits  
160 assessed in 2010 and in 2011. In agreement with the distribution of most flavonoid metabolites and  
161 colour-related traits in the progeny, which were in the 4 to 10-fold range, the pelargonidin-3-glucoside,  
162 which contributes to the total anthocyanin content for as much as ~90%, displayed a 5-fold variation  
163 among the most contrasted individuals. As could be expected, the ANTHc values measured by  
164 colourimetry varied in the same range as pelargonidin-3-glucoside. In contrast, considerable variations  
165 were observed for the minor anthocyanin forms cyanidin-3-glucoside and pelargonidin-3-rutinoside,  
166 which displayed 23-fold and 114-fold variations in the progeny, respectively; and for the COLOUR value,  
167 which ranged from 0.5 to 6 in the most extreme progeny individuals. The pelargonidin-3-glucoside-  
168 malonate and cyanidin-3-glucoside additionally showed a much skewed distribution in the progeny, with  
169 a high number of individuals in which these anthocyanin compounds were not detected (Figure 1B and  
170 Supplemental Fig. 2).

171 For linkage map construction with SNP, SSR, SSCP and AFLP markers, only single-dose markers (SD)  
172 in backcross configuration that segregated in the expected 1:1 ratio ( $P < 0.01$ ) were considered, as  
173 previously described (Lerceteau-Köhler et al. 2012; Perrotte et al. 2016). A total of 9,455 SNP markers  
174 were selected from the Axiom® IStraw90® SNP array (4,974 female and 4,481 male markers) (Bassil et al.

175 2015) and added to the previous linkage maps (Rousseau-Gueutin et al. 2008). In the end, the  
176 construction of the linkage maps was done with a total of 5,216 and 4,879 markers for the female and  
177 the male linkage maps, respectively. The final number of markers covered the expected 28 linkage  
178 groups for the female map and 32 linkage groups for the male map (3 additional small linkage groups  
179 were included). The length of the female and male linkage maps were 4,135.1 cM and 3,929.2 cM,  
180 respectively, with an average distance between markers of 0.8 cM.

181 Linkage groups were assigned to one of the seven homoeologous groups. Letters naming a given  
182 homoeologous linkage group (e.g. LG1a, b, c or d) are as previously described (Rousseau-Gueutin et al.  
183 2008; Labadie et al. 2020). Thanks to the assignation of Affymetrix markers to the reference octoploid  
184 genome (Edger et al. 2019) (S. Verma and V. Whitaker, unpublished results), we were able to assign a  
185 given LG to one of the four subgenomes from cultivated strawberry. Detailed information on linkage  
186 map construction and assignation of specific LGs to one of the four subgenomes (referred to as *F.*  
187 *iinumae*, *F. nipponica*, *F. viridis* and *F. vesca* subgenomes in (Edger et al. 2019, 2020)) are provided in  
188 Supplemental Table 2.

189

190 *The Fragaria vesca subgenome is predominant in the genetic architecture of the fruit colour in*  
191 *cultivated strawberry*

192 QTL were detected for all the quantitative traits analyzed using composite interval mapping (CIM)  
193 for either 'Capitola' or 'CF1116'. Information on markers for male and female maps are respectively  
194 provided in Supplemental Table 3 and Supplemental Table 4. The list of significant QTLs detected for  
195 each trait including associated markers, position on male and female linkage maps, LOD score and effect  
196 is provided in Supplemental Table 5. The values of QTL thresholds at 5 and 10% that were used to select  
197 significant male and female QTLs for each trait and year are displayed in Supplemental Table 6.  
198 Distributions per homoeology groups (HG) and by linkage groups (LG) of significant colour-related  
199 mQTLs (PgGs, PgGsM, PgRs, CyGs, EpPgGs and Ant (summation of anthocyanins compounds)) and QTLs  
200 (ANTHc and COLOUR) are synthesized in Table 2 and Table 3 for male and female maps respectively.  
201 Graphical representation of location on male and female linkage map and Bayesian credible interval for  
202 the significant QTLs detected for the two years of observation (2010 and 2011) is shown in  
203 Supplemental Fig. 3.

204 Among the 65 QTLs detected for all the flavonoid and colour-related traits analyzed over the two  
205 years of study (Supplemental Table 5), a total of 37 significant colour-related QTLs (29 anthocyanins  
206 mQTLs, 4 ANTHc and 4 COLOUR QTLs) was detected (Table 1 and 2). Most LGS harbored only one region  
207 controlling variations in colour-related traits, the notable exception being the LG6a carrying 2 male and  
208 3 female regions with colour-related QTLs (Table 1). Quantitative variations of few anthocyanin  
209 compounds were controlled by mQTLs located on different LGs (i.e. on different subgenomes) within

210 the same HG (Table 2). The only examples are those of PgGs QTLs located on female LGs F3a and F3b in  
211 2011 and of PgRs QTLs located on male LGs M5a and M5b and M7a and M7d in 2011. Moreover, as with  
212 the results obtained by considering all the other flavonoid mQTLs, half of the colour-related QTLs  
213 detected were located on only three LGs on male map (M1a, M3a, M6a) (11 QTLs out of 22). The  
214 overwhelming majority of the colour-related QTLs detected on female map (12 QTLs out of 15) were  
215 located on only three LGs (F2a, F3a, F6a). Remarkably, the above-mentioned LGs correspond to the *F.*  
216 *vesca* subgenome (Supplemental Table 2) thus highlighting the predominant role of *F. vesca* in the  
217 determination of fruit colour in cultivated strawberry. While the *F. vesca* subgenome is responsible for  
218 major variations in PgGs content (F2a QTL:  $R^2= 15$ ; M3a QTL:  $R^2= 20.6$ ; F3a QTL:  $R^2= 8.8$ ; F6a QTL:  $R^2=$   
219  $19.7$ ), other subgenomes derived from *F. iinumae* (M1a QTL;  $R^2= 11.65$ ) and from *F. viridis* (M3b and  
220 M4d QTLs;  $R^2>7.5$ ) also contribute to PgGs variation's content in the progeny (Supplemental Table 5).  
221 Likewise, while variations in PgRs are mainly controlled by the *F. vesca* subgenome, the *F. iinumae*, *F.*  
222 *viridis* and *F. nipponica*-derived subgenomes are also involved in the control of PgRs. Other subgenomes  
223 than *F. vesca* also contribute to the value of breeding traits such as COLOUR (*F. viridis* F4d;  $R^2=9$ ).  
224 Because recent studies demonstrated the crucial role played by the *MYB10-2* homoeoallele located on  
225 the LG1 *F. iinumae*-derived subgenome in natural variations in fruit colour (Castillejo et al. 2020), we  
226 investigated whether *MYB10-2* could underlie the M1a Ant, PgGs, PgRs, AfPgGs, ANTHc and COLOUR  
227 QTLs (Supplemental Table 5). We found a SNP marker (AX-89846847) very close to the *MYB10-2*  
228 homoeoallele at position 15517937 bp on the subgenome Fvb1-2 of the Camarosa reference genome  
229 (Edger et al. 2019). This marker is linked to the flavan-3-ols AfCat\_2011 mQTL (Supplemental Fig. 3), but  
230 is far from the other M1a colour-related QTLs detected in our study, thereby indicating that genetic  
231 variations in *MYB10-2* are not causal.

232 Among the main colour-related QTLs, the mQTLs located on M3a and F6a (Table 1), display opposite  
233 effects on anthocyanin content (Supplemental Table 5). To further investigate if the Ant\_2010,  
234 PgGs\_2010 and COLOUR\_2011 QTLs had epistatic relationships, which would suggest common  
235 underlying control, we further studied the interaction of the colour- and anthocyanin-related  
236 homoeoalleles in LG3a and LG6a (Fig. 2). Variance analysis confirmed that male M3a QTLs had indeed a  
237 positive effect on trait values and female F6a QTLs a negative effect. However, because trait values were  
238 similar in individuals harbouring both M3a and F6a QTLs, we can conclude that there is likely no  
239 significant interaction between the M3a and F6a colour-related QTLs.

240 Although a given LG may carry different regions controlling various traits (e.g. LG6a on male or  
241 female linkage maps; Table 1 and 2), several QTLs were likely controlled by the same or by close  
242 homoeoalleles because the corresponding QTLs overlapped the Bayesian credible intervals in the  
243 parental map (Table 1; Supplemental Fig. 3). Among them, the QTLs controlling the anthocyanin PgGs  
244 and the COLOUR trait overlapped in a narrow chromosomal interval on M3a and F3a (Fig. 3A and

245 Supplemental Table 5). This suggests the presence of potential allelic forms of the same gene or of  
246 closely linked genes responsible for the variation of quantitative characters in this region.

247

248 *Anthocyanidin reductase (ANR) and MYB transcription factor underlie major QTLs controlling*  
249 *variations in fruit colour and pelargonidin-3-glucoside content*

250 The ~5-fold variations in anthocyanin content in the progeny were largely due to variations in  
251 pelargonidin-3-glucoside (Labadie et al. 2020; Fig. 1B and Supplemental Fig. 2). We could detect mQTLs  
252 for total anthocyanin (Ant) and PgGs on male map (M3a) in 2010 and on female map (F3a) in 2011, and  
253 COLOUR QTL on M3a in 2011 (Fig. 3A). CIM analysis further showed that the fruit COLOUR QTL and the  
254 Ant and PgGs mQTLs, which displayed high LOD scores values > 3.0, were co-located in a narrow  
255 chromosomal interval (Fig. 3B, C and D). Furthermore, the male allele from 'CF1116' (on M3a) had a  
256 positive effect on the levels of anthocyanins and COLOUR (Fig. 3B and C) while the female allele from  
257 'Capitola' (on F3a) had the opposite effect (Fig. 3D). This points to the likely presence in this region of  
258 two different allelic variants that control these traits, one from the male parent and one from the  
259 female parent. For Ant and PgGs, the percentages of phenotypic variance explained by the M3a mQTLs  
260 were twice as high as the F3a mQTLs (Supplemental Table 5). Because allelic variants underlining these  
261 QTLs are in heterozygous state in the segregating pseudo full-sibling F1 population analyzed (Lerceteau-  
262 Köhler et al. 2012), these results indicate that a single LG3a homoeoallelic variant out of the 8  
263 homoeoalleles present in the *F. x ananassa* genome is sufficient to affect either positively (male  
264 homoeoallelic variant) or negatively (female homoeoallelic variant) the same colour and flavonoid-  
265 related traits.

266

267 To detect the possible underlying candidate genes, we next identified for the QTLs co-localized on  
268 M3a and F3a an interval framed by SNP markers with physical positions on the diploid FvH4 *F. vesca*  
269 genome (Edger et al. 2018) that overlapped the Bayesian credible intervals. On M3a, this region is  
270 flanked by AX-89904962 and AX-89785774 Affymetrix markers and spans an interval on chromosome 3  
271 (Fvb3) from 1.213.489 b to 2.673.762 b (Edger et al. 2018), while on F3a this region is larger (826.085 b  
272 to 2.539.615 b) and almost overlapped with the M3a interval. Based on the latest annotation of the *F.*  
273 *vesca* genome (Li et al. 2019), we identified a total of 305 genes in the M3a interval (Supplemental Table  
274 7) and searched them for candidate genes possibly involved in the regulation and/or synthesis of  
275 flavonoids in strawberry fruit. Among them, we found two genes encoding MYB-related transcription  
276 factors annotated as *MYB58 (FvH4\_3g03680)* and *MYB102-like ODORANT (FvH4\_3g03780)*. A third  
277 potential candidate gene, annotated as NAD(P)-binding Rossmann-fold superfamily protein  
278 (*FvH4\_3g02980*), encodes an *anthocyanidin reductase (ANR)* enzyme, which catalyzes the conversion of  
279 pelargonidin to epiafzelechin and of cyanidin to epicatechin (Fig. 1A).



280 To further investigate these genes and/or to identify additional candidate genes underlying the  
281 strawberry fruit colour and anthocyanins mQTLs co-localized on M3a and F3a, we mined transcriptome  
282 data obtained by microarray analysis of 21 individuals from the segregating population which displayed  
283 contrasted flavonoid-related phenotypes. To this end, we first constituted two groups of seven F1  
284 individuals each displaying either high or low PgGs content at red ripe stage, with a PgGs content ratio  
285 between the two pools of 1.7 and 1.4 in 2010 and 2011, respectively (Fig. 4; Supplemental Table 8). We  
286 next analyzed these individuals for differentially-expressed genes (DEGs) using a custom-made  
287 oligonucleotide-based (60-mer length) platform representing a total of 18,152 strawberry unigenes  
288 (Ring et al. 2013). To identify significant DEGs present in the region of interest, we applied a Student t-  
289 test on the two phenotypic groups for all genes located in the Bayesian credible interval. Out of the 305  
290 genes found in the M3a interval that harbors the QTL and mQTLs of interest, 232 genes including  
291 *MYB102-like ODORANT* (*FvH4\_3g03780*), *MYB58* (*FvH4\_3g03680*) and *ANR* (*FvH4\_3g02980*) were  
292 present on the microarray (Supplemental Table 9). Among them, 49 DEGs (P value < 0.05) were found,  
293 which included *ANR* and *MYB102-like ODORANT* but not *MYB58*. The expression of the *MYB102-like*  
294 *ODORANT* and *ANR* genes were respectively 1.6 and 1.9 fold higher in the individuals with low PgGs  
295 content than in the individuals with high PgGs content (Supplemental Table 9 and Fig. 4). Analysis of the  
296 remaining DEGs did not highlight any additional candidate gene for the control of anthocyanin  
297 accumulation in the fruit (Supplemental Table 9).

298 Next, we performed Illumina Hiseq 3000 whole genome sequencing of ‘Capitola’ and ‘CF1116’  
299 parents that provided 137 and 142 million 150 pb paired-end reads, representing 50.7X and 52.7X  
300 coverage of octoploid genome (Edger et al. 2019), respectively. Alignment of paired reads to the *FvH4 F.*  
301 *vesca* genome (Edger et al. 2018) gave us access to the sequence polymorphisms of the *MYB102-like*  
302 *ODORANT* and *ANR* genes in both parents. Because these two genes are not only positional but also  
303 expressional candidate genes, we first analyzed sequence polymorphisms in regions that may affect  
304 gene regulation of *MYB102-like ODORANT* and *ANR*. In both *MYB102-like ODORANT* and *ANR* genes,  
305 several SNPs and insertions were found in the 1 kb region upstream of the 5’ untranslated region (UTR)  
306 by comparison of the ‘Capitola’ and ‘CF1116’ sequences. Only polymorphisms with segregation ratio  
307 fitting the 1:7 ratio expected for single male or female homoeoalleles (Chi2 test; P > 0.05) (Fig. 5) are  
308 discussed hereafter. Interestingly, we found a 18 bp deletion in the 5’UTR of *ANR* located from - 109 to -  
309 127 upstream of the start codon in the ‘CF1116’ (male parent) (Fig. 5). Analysis of the corresponding  
310 CTTCTCCTCTTCTTCTT sequence with the plant regulation analysis platform PlantRegMap (Jin et al.  
311 2017) predicted the deletion to be in the 21 nucleotide binding site of the *Arabidopsis* MYKC-MADS  
312 Agamous-like transcription factor AT2G45660. Blast analysis of *F. vesca* v1.0 ab hybrid reference  
313 genomic sequence at GDR (Jung et al. 2019) using AT2G45660 protein sequence as a query and  
314 visualization of fruit gene expression of top ten hits at *F. vesca* eFP browser (Hawkins et al. 2017)

315 allowed the identification of four fruit MYKS-MADS box genes expressed in strawberry fruit cortex  
316 (*gene24852*, *gene04229*, *gene26119* and *gene06301*) that may possibly interact with the sequence  
317 deleted in 'CF1116' ANR 5'UTR. Other small insertion/deletions (INDELS) or SNPs found in 5'UTR or  
318 promoter regions from *MYB102-like ODORANT* and *ANR* genes did not match known motifs. In a second  
319 step, we analyzed the protein coding regions of *MYB102-like ODORANT* and *ANR* (Fig. 5). While SNP  
320 polymorphisms found in *ANR* are synonymous and do not affect the function of the protein, two non-  
321 synonymous missense variations leading to H146Q and I206N amino acid substitutions were found at  
322 the expected 1:7 segregating ratio in exon 3 of the *MYB102-like ODORANT* from 'Capitola' (female  
323 parent).

324

325 To further explore whether SNP markers linked to either the LG3a *MYB102-like ODORANT* or the  
326 LG3a *ANR* gene would be useful for strawberry breeding, we analyzed the association between the SNP  
327 markers linked to the F3a and M3a PgGs mQTLs (Fig. 3) and fruit PgGs content. To this end, we used the  
328 14 selected individuals displaying high or low PgGs content and *ANR* and *MYB* expression in the ripe fruit  
329 (Fig. 4). While no significant results were found for the F3a PgGs mQTL ( $R^2= 8.8$ ), all the individuals with  
330 high-PgGs content showed the presence of the SNP marker AX-89826853 (position: 1981447 bp on  
331 FvH4), which is strongly linked to the major M3a PgGs mQTL ( $R^2=20.6$ ) and is close to the *ANR* gene  
332 (position: 1583755 bp on FvH4). Conversely, the low-PgGs individuals did not display the presence of  
333 this marker. This result indicates that a MAS strategy based on the AX-89826853 marker can be  
334 envisaged for breeding strawberry varieties with improved fruit colour.

335

## 336 Discussion

337

338 Flavonoid biosynthesis and, in particular, anthocyanin biosynthesis, have been thoroughly  
339 investigated in strawberry because of their considerable importance for the sensorial and nutritional  
340 quality of the fruit, which is a major breeding target (Mezzetti et al. 2018). So far, most studies were  
341 focused on fruit composition analysis in various strawberry species and varieties (Muñoz et al. 2011; Roy  
342 et al. 2018) and on candidate genes encoding known regulators or structural enzymes of the flavonoid  
343 pathway. As evidenced by reverse genetic studies on wild diploid and cultivated strawberry, the  
344 phenylpropanoid-regulating MYB, bHLH and WD-repeat proteins transcription factors play prominent  
345 roles in anthocyanin regulation (Jaakola 2013; Härtl et al. 2017; Zhang et al. 2020). Additional candidates  
346 are the structural enzymes involved in flavonoid and anthocyanin pathways (Almeida et al. 2007;  
347 Griesser et al. 2008; Fischer et al. 2014) and in connected pathways leading to phenylpropanoid-derived  
348 compounds (Ring et al. 2013). To date, insights into the genetic architecture of anthocyanin biosynthesis  
349 in strawberry were limited to few studies on the wild diploid *F. vesca* (Urrutia et al. 2016) and on the

350 cultivated strawberry (Lerceteau-Köhler et al. 2012; Labadie et al. 2020). Identification of the genetic  
351 variations underlying fruit colour were even scarcer until the recent studies of the contribution of  
352 MYB10 to the white fruit phenotype in the wild diploid strawberry *F. nilgerrensis* (Zhang et al. 2020) and  
353 to the variation of fruit skin and flesh colour in woodland diploid strawberry *F. vesca* and in cultivated  
354 octoploid strawberry *F. × ananassa* (Castillejo et al. 2020).

355 In the last decade, novel tools including high density SNP arrays (Bassil et al. 2015) for high  
356 resolution genotyping of cultivated strawberry *F. × ananassa* and MS-based methods for the exhaustive  
357 analysis of specialized metabolites in strawberry fruit (Ring et al. 2013; Haugeneder et al. 2018) have  
358 been established. In parallel, considerable advances have been made in our understanding of strawberry  
359 genomes, including the release of high quality genome sequences of diploid woodland strawberry *F.*  
360 *vesca* (Shulaev et al. 2011; Edger et al. 2018) and octoploid *F. × ananassa* (Edger et al. 2019; Liston et al.  
361 2020). Thanks to these advances, we could thoroughly investigate the genetic architecture of the colour-  
362 related QTLs previously identified (Lerceteau-Köhler et al. 2012) by (i) high resolution mapping to single  
363 linkage groups (LGs) of colour traits broken down into their individual components, (ii) the identification  
364 of the donor subgenomes carrying the homoeoalleles responsible for colour variation (Edger et al.  
365 2019), and (iii) the discovery of causal homoeoallelic variations underlying several colour QTLs. This  
366 opens the possibility to use MAS to breed strawberry varieties with the desired colour characteristics.

367

368 **Flavonoids and anthocyanins metabolism are largely controlled by the dominant woodland**  
369 **strawberry *F. vesca* subgenome in cultivated strawberry fruit**

370 Thanks to the precise assignation of a QTL to a narrow genomic region, the genetic architecture of  
371 flavonoid-dependent traits can now be explored to an unprecedented level in cultivated strawberry. In  
372 polyploid plant species, each trait is likely controlled by homoeologous gene series or homoeoalleles.  
373 Homoeoalleles are alleles located at orthologous positions on the subgenomes that compose the  
374 polyploid species (Gaston et al. 2020). The recent sequencing of the octoploid cultivated strawberry  
375 genome (Edger et al. 2019; Edger et al. 2020) showed that it is composed of four diploid subgenomes  
376 including the wild diploid woodland strawberry *F. vesca*, a diploid ancestor of *F. iinumae*, and two  
377 species relative to *F. viridis* and *F. nipponica*, the origin of which is under study (Liston et al. 2019). QTL  
378 localization on linkage groups together with the positions of the SNP markers (Bassil et al. 2015) on the  
379 various subgenomes from *F. × ananassa* (Supplemental Table 2) allowed us to identify the subgenome(s)  
380 that are likely responsible for flavonoid trait variations. Remarkably, our results showed that most  
381 variations in anthocyanins, and more broadly in flavonoids, were controlled by mQTLs located on a  
382 single linkage group (i.e. on a single subgenome) within a given homoeology group. As an example, the  
383 *F. vesca* subgenome was likely responsible for the major pelargonidin-3-glucoside mQTLs located on  
384 M3a, F3a and F6a linkage groups. More generally, the main linkage groups accounting for half of male

385 colour-related QTLs (3 LGs) and for the majority of female QTLs (3 LGs) can be attributed to the *F. vesca*  
386 subgenome, thus highlighting the predominant role of *F. vesca* in fruit flavonoid metabolism and  
387 therefore in *F. x ananassa* fruit quality. These findings support the conclusions from Edger et al. (2019)  
388 who showed that *F. vesca* is the dominant subgenome in the octoploid strawberry and suggested that *F.*  
389 *vesca* homoeologs are responsible for almost 89% of the biosynthesis of anthocyanins in octoploid  
390 strawberry.

391 Though the precise assignation to a given subgenome is still delicate and debated (Liston et al.  
392 2020), our results also point out that, in addition to *F. vesca*, other subgenomes may play key roles in  
393 flavonoid metabolism, for example the *F. iinumae* and *F. viridis*-derived subgenomes for pelargonidin-3-  
394 glucoside content; the *F. iinumae*, *F. viridis* and *F. nipponica* subgenomes for pelargonidin-3-rutinoside  
395 content; and the *F. viridis* for COLOUR. A striking example is the crucial role played by *MYB10-2*  
396 homoeoallele (*F. iinumae*-derived subgenome) in the regulation of fruit colour in cultivated strawberry  
397 (Castillejo et al. 2020). Careful comparison of the location of the *MYB10-2* homoeoallele and of the  
398 colour-related QTLs detected in our study showed that *MYB10-2* has likely no incidence on fruit colour  
399 variations in the progeny studied here. These findings further indicates that additional, *MYB10-2*-  
400 independent, genetic variations carried by the *F. iinumae*-derived subgenome are responsible for the  
401 colour-related QTLs found on M1a including the pelargonidin-3-glucoside, pelargonidin-3-rutinoside,  
402 (epi)afzelechin-pelargonidin-glucoside and COLOUR QTLs. From a broader perspective, it cannot be  
403 excluded that subgenome-dependent control of anthocyanin content and composition may become  
404 prevalent in different genetic contexts or in adverse environmental conditions, as hypothesized in  
405 Lerceteau-Köhler et al. (2012). By deciphering the contribution of the four different subgenomes of *F. x*  
406 *ananassa* to the genetic architecture of the flavonoid and anthocyanin composition, our results further  
407 open the possibility to identify the subgenome-specific homoeoalleles responsible for major variations  
408 in colour-related traits in cultivated strawberry.

409

#### 410 **ANR and MYB genes from the *F. vesca* subgenome are likely candidates for controlling variations in** 411 **strawberry fruit colour**

412 The major QTLs detected here on LG3a for the total anthocyanins, for pelargonidin-3-glucoside and for  
413 the visually scored fruit colour are all co-located at the beginning of the linkage group (Fig. 3A) and  
414 overlap the colour-related QTLs previously detected over three years of study for the physical  
415 parameters L and b (colour space values) (Lerceteau-Köhler et al. 2012), indicating that these colour  
416 QTLs are robust. We could further decipher the genetic architecture of the colour trait and show that: (i)  
417 pelargonidin-3-glucoside mQTLs displaying high LOD scores values > 3.0 are co-located on both male  
418 (M3a) and female (F3a) maps in a narrow chromosomal interval encompassing 305 genes, (ii) the male  
419 homoeoallele from 'CF1116' has a positive effect on pelargonidin-3-glucoside content (Fig. 3B and C)

420 while the female homoeoallele from ‘Capitola’ has the opposite effect (Fig. 3D), (iii) homoeoallelic  
421 variants of two candidate genes encoding anthocyanidin reductase (ANR) and MYB102-like ODORANT,  
422 both of which are differentially expressed in pools of individuals with contrasted pelargonidin-3-  
423 glucoside contents, are found in the male (‘CF1116’) and female (‘Capitola’) parents, respectively.

424 MYB transcription factors (TFs) belong to a family of TFs playing predominant roles in the control of  
425 phenylpropanoid pathway (Ma and Constabel 2019). To date, various MYB transcription factors and the  
426 MYB/bHLH/WD-repeat protein complex are known to regulate anthocyanin biosynthesis in strawberry  
427 (Salvatierra et al. 2013; Schaart et al., 2013; Medina-Puche et al. 2014; Wang et al. 2020). The best  
428 studied strawberry MYB is MYB10, whose mutation induces a loss of red fruit colour in the cultivated  
429 strawberry and in the wild diploid species *F. vesca* and *F. nilgirensis* (Medina-Puche et al. 2014; Hawkins  
430 et al. 2016; Wang et al. 2020; Castillejo et al. 2020; Zhang et al. 2020). However, the most likely MYB  
431 candidate gene underlying the female F3a pelargonidin-3-glucoside mQTL is not homologous to a well  
432 characterized strawberry MYB. It encodes a MYB102-like ODORANT protein homologous to the petunia  
433 R2R3-MYB ODORANT1 (ODO1) described as regulator of the floral-scent related genes of the  
434 phenylpropanoid biosynthesis pathway (Spitzer-Rimon et al. 2010). Though ODO1 has no effect on  
435 anthocyanin biosynthesis in petunia (Spitzer-Rimon et al. 2010), its ectopic expression in tomato  
436 activates phenylpropanoid metabolism without affecting volatiles (Dal Cin et al. 2011). In addition to the  
437 two SNPs leading to synonymous amino acid changes in *ODO1* coding region, the *MYB102-like*  
438 *ODORANT* gene from ‘Capitola’ LG3a carries several SNPs and INDELS in the 5’UTR and promoter  
439 regions, which opens the possibility that transcriptional regulation of this MYB gene (Fig. 4) may be  
440 responsible for variation in anthocyanin biosynthesis, regardless of its weak expression in the fruit  
441 (Hawkins et al. 2017). Altogether, these information warrant further investigation of *MYB102-like*  
442 *ODORANT* function in strawberry fruit.

443 In strawberry, ANR converts respectively the anthocyanidins pelargonidin and cyanidin to the  
444 flavan-3-ols, either to epiafzelechin, which can be derived to epiafzelechin-glucose, or to epicatechin  
445 (Fig. 1A). ANR is encoded by a single gene with two predicted alternative transcripts in *F. vesca* genome.  
446 Mining the *F. vesca* gene expression atlas database (Hawkins et al. 2017) further showed that *ANR* is  
447 very highly expressed in fruit cortex at early developing stages until white fruit stage (onset of ripening)  
448 and moderately thereafter. *ANR* is therefore a strong expressional candidate for the regulation of  
449 anthocyanins in strawberry fruit. It is to be noted that a single homoeoallele from the ‘CF1116’ *F. vesca*-  
450 derived subgenome out of the 8 homoeoalleles present in the octoploid genome would be responsible  
451 for the large effect of the M3a QTL. Because this homoeoallelic variant is likely overexpressed in  
452 individuals with low pelargonidin-3-glucoside content (Fig. 4) and that the deletion identified in *ANR*  
453 5’UTR falls within a MYKS-MADS box binding domain, the candidate MADS box would be involved in the  
454 negative regulation of the *ANR* gene. During fruit ripening, the lack of negative regulation of *ANR* (no

455 MADS box binding) would maintain a high ANR transcript level in the ripening fruit (Fig. 4), thereby  
456 keeping the phenylpropanoid flux channeled towards flavan-3-ols synthesis at the expense of  
457 anthocyanin formation (Fig. 1A). The down-regulation of ANR at earlier stages of fruit development  
458 should therefore trigger the enhanced accumulation of anthocyanins in the fruit before ripening.  
459 Conversely, its up-regulation in the ripening fruit would lead to reduced anthocyanin accumulation.  
460 Indeed, we previously demonstrated (Fischer et al. 2014) that ANR silencing in strawberry leads to the  
461 early accumulation of anthocyanins in the fruit, by re-routing the flux from flavan-3-ols to anthocyanins.  
462 At the opposite, Zhao et al. (2017) recently showed that overexpression of tea (*Camellia sinensis*) ANR  
463 genes in tobacco effectively leads to a significant loss of flower red-pigmentation by reducing their  
464 anthocyanin content. These results further support the hypothesis that the increased expression of a  
465 LG3a-located 'CF1116' ANR homoeoallele from the *F. vesca*-derived subgenome is responsible for the  
466 increased accumulation of pelargonidin-3-glucoside that likely underlies the M3a colour mQTL.

467 The involvement of MADS-box genes in anthocyanin accumulation have been reported in different  
468 species including Arabidopsis (Nesi et al. 2002) and other Rosaceae fruit species such as bilberry (Jaakola  
469 et al. 2010) and pear (Wang et al. 2017). Among the four MADS box candidates expressed in fruit cortex,  
470 two of them (*gene26119*, *gene06301*) that are expressed at late stages of fruit development (Hawkins et  
471 al. 2017) show a pattern of expression opposite to that of ANR, which makes them potential candidates  
472 for regulating ANR in strawberry fruit. Because the control of anthocyanin accumulation by MADS-box  
473 TFs remains unclear, the regulation of ANR by MADS-box genes in strawberry fruit is a working  
474 hypothesis worth exploring.

475

## 476 **Conclusions**

477

478 We demonstrated for the first time in this study that, by breaking down fruit colour traits into  
479 smaller components corresponding to individual flavonoid compounds and by delineating the resulting  
480 mQTLs to narrow genomic regions corresponding to specific subgenomes of the cultivated strawberry,  
481 the identification of homoeoallelic variants likely underlying the flavonoid mQTLs is now feasible. By  
482 deciphering the genetic architecture of fruit colour, our results further support, at the genetic level, the  
483 hypothesis that the flavonoid metabolism is mainly controlled by the *F. vesca*-derived subgenome in the  
484 octoploid cultivated strawberry. Our findings also point out that other subgenomes from the cultivated  
485 strawberry effectively contribute to the control of fruit colour. We additionally provide complementary  
486 genetic and genomic evidences that natural diversity found in ANR plays a main role in the modulation  
487 of fruit anthocyanin content in cultivated strawberry, the key function of ANR being supported by  
488 previous reverse genetic studies. Moreover, our study opens new research avenues on the hitherto  
489 unknown role in the regulation of anthocyanin accumulation in strawberry fruit of several TFs belonging

490 to the MADS-box and MYB families. From a more applied perspective, the possibility to identify genetic  
491 variations underlying major anthocyanins mQTLs in strawberry provides the means to develop MAS  
492 markers closely linked to fruit colour, which is a main breeding target from the consumer's perspective.  
493 An important step toward reaching that end is the identification of a SNP marker close to the ANR gene  
494 underlying the major pelargonidin-3-glucoside mQTL located on M3a, which explains > 20% of the  
495 phenotypic variance.

496

## 497 **Experimental procedures**

498

### 499 *Plant materials and preparation*

500 A pseudo full-sibling F<sub>1</sub> population of 165 individuals obtained from a cross between the variety  
501 'Capitola' (CA75.121-101 x Parker, University of California, Davis, USA) and the advanced line 'CF1116'  
502 (['Pajaro' x ('Earlyglow' x 'Chandler'), reference from the Ciref, France) was developed. The 'Capitola'  
503 and 'CF1116' parents display contrasting fruit colour together with differences in fruit shape and weight,  
504 firmness, sweetness and acidity (Lerceteau-Köhler et al. 2012). For each of the two consecutive study  
505 years (2010 and 2011), cold-stored strawberry plants planted in 2009 and 2010 were grown in soil-free  
506 pine bark substrate under plastic tunnel with daily ferti-irrigation and control of biotic stresses. Mapping  
507 population included a total of 165 individuals over the two study years. Within this progeny, 72 and 131  
508 individuals, including parents, were respectively phenotyped in 2010 and in 2011. Fruits were harvested  
509 at red ripe stage, when red colouration of the fruit is homogeneous, and processed as previously  
510 indicated (Labadie et al. 2020) to produce frozen powder samples that were further stored at -80°C until  
511 use for chemical analyses.

512

### 513 *Fruit colour evaluation and flavonoid chemical analyses*

514 In 2011, for both harvests, red ripe fruits (4-5 fruits per harvest) were also photographed side-by-  
515 side with the strawberry colour chart from Ctifl  
516 (<http://www.ctifl.fr/Pages/Kiosque/DetailsOuvrage.aspx?IdType=3&idouvrage=833>). Fruit colour was  
517 then scored by two independent persons (2 replicates) on a scale from 0 (very pale red-orange) to 6  
518 (very dark red) using the photographs. A mean score value was then obtained for each genotype  
519 (Supplemental Fig. 1).

520 Analysis of polyphenolic metabolites by LC-ESI-MS was done as previously described (Ring et al.  
521 2013). A total of 16 traits encompassing individual phenolic metabolites [13 metabolites: anthocyanins  
522 (pelargonidin-3-glucoside; pelargonidin-3-glucoside-malonate; pelargonidin-3-rutinoside;  
523 (epi)afzelechin-pelargonidin-glucoside; cyanidin-3-glucoside), flavonols (kaempferol-glucuronide;  
524 kaempferol-glucoside; kaempferol-coumaroyl-glucoside; quercetin-glucuronide), flavan-3-ols (catechin;

525 (Epi)catechin dimers; (epi)afzelechin-(epi)catechin dimers; (epi)afzelechin-glucoside) and their sum [3  
526 traits: total anthocyanins, total flavonols, total flavan-3-ols] were measured for the two years. Analyses  
527 of pooled frozen powder samples were carried out in 2010 and 2011 on 6 replicates for parents and on  
528 3 replicates for individuals from the progeny.

529 Extraction and measurement of total anthocyanin content (ANTHc) by colourimetric assay were as  
530 described in Labadie et al. (2020). Results are expressed as mg pelargonidin-3-glucoside equivalents/100  
531 g fresh weight. For each genotype, 4 technical repeats from the pooled two-harvest-fruit-powder were  
532 performed.

533

#### 534 *Genotyping*

535 DNA from the parental lines 'Capitola' and 'CF1116' and from 165 individuals from the mapping  
536 population was extracted using DNeasy Plant Mini kit (Qiagen, Hilden, Germany) and hybridized with the  
537 Affymetrix® 90 K Axiom® SNP array (Affymetrix, CA, USA) at CeGen USC (Santiago de Compostela,  
538 Spain). IStraw90® SNP array includes 138,000 SNP markers corresponding to 90,000 localizations on wild  
539 diploid strawberry *F. vesca* 'Hawai' v1.1 genome (Bassil et al. 2015). Analysis was performed using  
540 Genotyping console™ and SNPpolisher© (Affymetrix, CA, USA) following manufacturers  
541 recommendations.

542

#### 543 *Linkage maps and QTL analysis*

544 Frequency distribution of each trait was represented using ggplot2 (v3.2.1; Wickham et al., 2019) r-  
545 package. Single dose markers (SD) from the Affymetrix array (Bassil et al. 2015) that were in backcross  
546 configuration and segregated 1:1 (Rousseau-Gueutin et al. 2008) were used in combination with  
547 previously mapped SSR, SSCP and AFLP markers (Gaston et al. 2013; Labadie et al. 2020) for map  
548 construction using JoinMap 5.1 software (Van Ooijen 2011). Grouping was performed using  
549 independence log of the odds (LOD) and the default settings in JoinMap® and linkage groups were  
550 chosen from a LOD higher than 10 for all of them. Map construction was performed using the maximum  
551 likelihood (ML) mapping algorithm and the following parameters: chain length 5,000, initial acceptance  
552 probability 0,250, cooling control parameter 0,001, stop after 30,000 chains without improvement,  
553 length of burn-in chain 10,000, number of Monte Carlo EM cycles 4, chain length per Monte Carlo EM  
554 cycle 2,000 and sampling period for recombination frequency matrix samples: 5.

555 For QTL analysis, the female and male linkage parental maps based on the 165 individuals were used  
556 separately. Phenotypic data of the 72 and 131 individuals for 2010 and 2011, respectively, were  
557 represented by the mean value of the three replicates. QTL detection was performed by simple interval  
558 mapping (SIM) using R/QTL (Broman et al. 2003). Permutation analysis, using 1000 permutations, was  
559 performed to calculate the critical LOD score. QTL with LOD values higher than the LOD threshold at  $P \leq$



560 0.05 were considered significant. When one QTL was found significant, we used composite interval  
561 mapping (CIM) (Zeng 1993, 1994) with one co-variable at the position of the significant QTL and  
562 reiterated the analysis until no new significant QTLs were detected. Bayesian credible interval was  
563 calculated using the function 'bayesint' at probability of 0.95. The proportion of phenotypic variance  
564 explained by a single QTL was calculated as the square of the partial correlation coefficient ( $R^2$ ).  
565 Mapping results are displayed using MapChart (Voorrips, 2002).

566

#### 567 *Gene expression analysis*

568 A custom-made oligonucleotide-based (60-mer length) platform designed (Roche NimbleGen) from  
569 non-redundant *Fragaria vesca* strawberry sequences (Fv\_v1.0 Shulaev et al. 2011) representing a total  
570 of 18,152 unigenes (Ring et al. 2013) was used for the analysis of differentially-expressed genes between  
571 21 F1 genotypes from the 'Capitola' x 'CF1116' population displaying contrasted phenotypic values for  
572 flavonoids and colour-related traits. RNA extraction from red ripe fruits and microarray processing and  
573 data analysis were as previously described (Ring et al. 2013). Student's t test was used with a confidence  
574 of  $P < 0.05$  to detect statistically significant differences.

575

#### 576 *Whole genome sequencing*

577 Whole genome sequencing of the two parents 'Capitola' and 'CF1116' was performed using paired-  
578 end Illumina sequencing with a  $\sim 50X$  coverage of the *F. x ananassa* genome. Illumina paired-end  
579 shotgun-indexed libraries were prepared and sequenced using an Illumina HiSeq 3000 at the Institut  
580 National de la Recherche Agronomique GeT-PlaGe facility (Toulouse, France), operating in a 150-bp  
581 paired-end run mode. Raw fastq files were mapped to the FvH4 reference genome sequence *F. vesca*  
582 (Edger et al. 2018) using bwa mem algorithm for the alignment of paired-end (150 bp) Illumina reads.  
583 Polymorphisms between 'Capitola' and 'CF1116' were identified using Integrative Genomics Viewer  
584 (IGV) (Robinson et al. 2011). All identified polymorphisms were tested for the 1:7 (mutant allele:WT  
585 alleles) segregation ratio for goodness-of-fit to theoretical ratio (Chi2 test) when considering the  
586 hypothesis that, out of the eight homoeoalleles expected in the octoploid *F. x ananassa*, one single  
587 homoeoallele (mutant allele) specific to 'Capitola' or to 'CF1116' controls the trait.

588

#### 589 **Acknowledgements**

590 We thank Sujeet Verma and Vance Whitaker (University of Florida) for providing the assignation of  
591 Affymetrix markers to the reference octoploid genome. We thank Karine Tallès and Gabriel Jousseume  
592 for fruit harvests and colourimetric measurements. The authors gratefully acknowledge support from  
593 Région Nouvelle Aquitaine (AgirClim project N°2018-1R20202), the EU ERANET (FraGenomics N°PCS-08-

594 TRIL-00) and the European Union's Horizon 2020 research and innovation program (GoodBerry project  
595 N° 679303). NGS data were produced by GeT-PlaGe Toulouse, France.

596

597 **Accession numbers**

598 *Anthocyanidin reductase*: FvH4\_3g02980 (*gene24665*); *MYB102-like ODORANT*: FvH4\_3g03780  
599 (*gene30725*); *MYB58*: FvH4\_3g03680 (*gene30736*).

600

601 **References**

602

603 Almeida JR, D'Amico E, Preuss A, Carbone F, de Vos CH, Deiml B, Mourgues F, Perrotta G, Fischer TC,  
604 Bovy AG, Martens S, Rosati C. (2007) Characterization of major enzymes and genes involved in flavonoid  
605 and proanthocyanidin biosynthesis during fruit development in strawberry (*Fragaria x ananassa*). Arch  
606 Biochem Biophys. 465:61-71. doi: 10.1016/j.abb.2007.04.040.

607 Bassil NV, Davis TM, Zhang H, Ficklin S, Mittmann M, Webster T, Mahoney L, Wood D, Alperin ES,  
608 Rosyara UR, Koehorst-Vanc Putten H, Monfort A, Sargent DJ, Amaya I, Denoyes B, Bianco L, van Dijk T,  
609 Pirani A, Iezzoni A, Main D, Peace C, Yang Y, Whitaker V, Verma S, Bellon L, Brew F, Herrera R, van de Weg E  
610 (2015) Development and preliminary evaluation of a 90 K Axiom® SNP array for the allo-octoploid  
611 cultivated strawberry *Fragaria × ananassa*. BMC Genomics 16:155-185. [https://doi.org/10.1186/s12864-](https://doi.org/10.1186/s12864-015-1310-1)  
612 015-1310-1

613 Battino M, Beekwilder J, Denoyes-Rothan B, Laimer M, McDougall GJ, Mezzetti B (2009) Bioactive  
614 compounds in berries relevant to human health. Nutr Rev 67:S145-S150. [https://doi.org/10.1111/j.1753-](https://doi.org/10.1111/j.1753-4887.2009.00178.x)  
615 4887.2009.00178.x

616 Broman KW, Wu H, Sen S, Churchill GA (2003) R/qtl: QTL mapping in experimental crosses.  
617 Bioinformatics 19:889-890. <https://doi.org/10.1093/bioinformatics/btg112>

618 Butelli E, Titta L, Giorgio M, Mock HP, Matros A, Peterek S, Schijlen EG, Hall RD, Bovy AG, Luo J, Martin  
619 C (2008) Enrichment of tomato fruit with health-promoting anthocyanins by expression of select  
620 transcription factors. Nat Biotechnol 26:1301-1308. <https://doi.org/10.1038/nbt.1506>

621 Castillejo C, Waurich V, Wagner H, Ramos R, Oiza N, Muñoz P, et al. (2020) Allelic Variation of MYB10 is  
622 the Major Force Controlling Natural Variation of Skin and Flesh Color in Strawberry (*Fragaria* spp.) fruit.  
623 bioRxiv preprint doi: <https://doi.org/10.1101/2020.06.12.148015>

624 Cockerton HM, Vickerstaff RJ, Karlström A, Wilson F, Sobczyk M, He JQ, Sargent DJ, Passey AJ, McLeary  
625 KJ, Pakozdi K, Harrison N, Lumbreras-Martinez M, Antanaviciute L, Simpson DW, Harrison RJ. (2018)  
626 Identification of powdery mildew resistance QTL in strawberry (*Fragaria × ananassa*). Theor Appl Genet.  
627 131:1995-2007. doi: 10.1007/s00122-018-3128-0.

- 628 Dal Cin V, Tieman DM, Tohge T, McQuinn R, de Vos RC, Osorio S, Schmelz EA, Taylor MG, Smits-Kroon  
629 MT, Schuurink RC, Haring MA, Giovannoni J, Fernie AR, Klee HJ (2011) Identification of genes in the  
630 phenylalanine metabolic pathway by ectopic expression of a MYB transcription factor in tomato fruit. *Plant*  
631 *Cell* 23:2738-2753. doi: 10.1105/tpc.111.086975.
- 632 Denoyes B, Amaya I, Liston A, Tennessen J, Ashman TL, Whitaker VM, Hytönen T, van de Weg E, Osorio  
633 S, Folta KM, Slovin J, Harrison RJ, Monfort A, Bassil NV (2017) Genomics tools available for unravelling  
634 mechanisms underlying agronomical traits in strawberry with more to come. *Acta Hort* 1156:13-24.  
635 <https://doi.org/10.17660/ActaHortic.2017.1156.3>
- 636 Edger PP, VanBuren R, Colle M, Poorten TJ, Wai CM, Niederhuth CE, Alger EI, Ou S, Acharya CB, Wang  
637 J, Callow P, McKain MR, Shi J, Collier C, Xiong Z, Mower JP, Slovin JP, Hytönen T, Jiang N, Childs KL, Knapp SJ  
638 (2018) Single-molecule sequencing and optical mapping yields an improved genome of woodland  
639 strawberry (*Fragaria vesca*) with chromosome-scale contiguity. *GigaScience* 7:1-7.  
640 <https://doi.org/10.1093/gigascience/gix124>
- 641 Edger PP, Poorten TJ, VanBuren R, Hardigan MA, Colle M, McKain MR, Smith RD7, Teresi SJ, Nelson  
642 ADL, Wai CM, Alger EI, Bird KA, Yocca AE, Pumplin N, Ou S, Ben-Zvi G, Brodt A, Baruch K, Swale T, Shiue L,  
643 Acharya CB, Cole GS, Mower JP, Childs KL, Jiang N, Lyons E, Freeling M, Puzey JR, Knapp SJ (2019) Origin and  
644 evolution of the octoploid strawberry genome. *Nat Genet* 51:541-547. [https://doi.org/10.1038/s41588-](https://doi.org/10.1038/s41588-019-0356-4)  
645 [019-0356-4](https://doi.org/10.1038/s41588-019-0356-4)
- 646 Edger PP, McKain MR, Yocca AE, Knapp SJ, Qiao Q, Zhang T. (2020) Reply to: Revisiting the origin of  
647 octoploid strawberry. *Nat Genet* 52:5-7. doi: 10.1038/s41588-019-0544-2.
- 648 Fischer TC, Mirbeth B, Rentsch J, Sutter C, Ring L, Flachowsky H, Habegger R, Hoffmann T, Hanke MV,  
649 Schwab W (2014) Premature and ectopic anthocyanin formation by silencing of anthocyanidin reductase in  
650 strawberry (*Fragaria × ananassa*). *New Phytol* 201:440-451. <https://doi.org/10.1111/nph.12528>
- 651 Gasparrini M, Giampieri F, Forbes-Hernandez TY, Afrin S, Cianciosi D, Reboledo-Rodriguez P, Varela-  
652 Lopez A, Zhang J, Quiles JL, Mezzetti B, Bompadre S, Battino M (2018) Strawberry extracts efficiently  
653 counteract inflammatory stress induced by the endotoxin lipopolysaccharide in Human Dermal Fibroblast.  
654 *Food Chem Toxicol* 114:128-140. <https://doi.org/10.1016/j.fct.2018.02.038>
- 655 Gaston A, Perrotte J, Lerceteau-Köhler E, Rousseau-Gueutin M, Petit A, Hernould M, Rothan C,  
656 Denoyes B (2013) PFRU, a single dominant locus regulates the balance between sexual and asexual plant  
657 reproduction in cultivated strawberry. *J Exp Bot* 64:1837-1848. <https://doi.org/10.1093/jxb/ert047>
- 658 Gaston A, Osorio S, Denoyes B, Rothan C (2020) Applying the Solanaceae Strategies to Strawberry Crop  
659 Improvement. *Trends Plant Sci* 25: 130-140. <https://doi.org/10.1016/j.tplants.2019.10.003>
- 660 Giampieri F, Alvarez-Suarez J, Battino M (2014) Strawberry and human health: effects beyond  
661 antioxidant activity. *J. Agric. Food Chem.* 62: 3867–3876.

- 662 Giampieri F, Alvarez-Suarez JM, Cordero MD, Gasparrini M, Forbes-Hernandez TY, Afrin S, Santos-  
663 Buelga C, González-Paramás AM, Astolfi P, Rubini C, Zizzi A, Tulipani S, Quiles JL, Mezzetti B, Battino M  
664 (2017) Strawberry consumption improves aging-associated impairments, mitochondrial biogenesis and  
665 functionality through the AMP-activated protein kinase signaling cascade. *Food Chem* 234:464-471.  
666 <https://doi.org/10.1016/j.foodchem.2017.05.017>
- 667 Hanhineva K, Rogachev I, Aura AM, Aharoni A, Poutanen K, Mykkänen H (2011) Qualitative  
668 characterization of benzoxazinoid derivatives in whole grain rye and wheat by LC-MS metabolite profiling. *J*  
669 *Agric Food Chem* 59:921-927. <https://doi.org/10.1021/jf103612u>
- 670 Härtl K, Denton A, Franz-Oberdorf K, Hoffmann T, Spornraft M, Usadel B, Schwab W (2017) Early  
671 metabolic and transcriptional variations in fruit of natural white-fruited *Fragaria vesca* genotypes. *Sci Rep*  
672 7:45113. <https://doi.org/10.1038/srep45113>
- 673 Haugeneder A, Trinkl J, Härtl K, Hoffmann T, Allwood JW, Schwab W (2018) Answering biological  
674 questions by analysis of the strawberry metabolome. *Metabolomics* 14:145.  
675 <https://doi.org/10.1007/s11306-018-1441-x>
- 676 Hawkins C, Caruana J, Schiksnis E, Liu Z (2016) Genome-scale DNA variant analysis and functional  
677 validation of a SNP underlying yellow fruit colour in wild strawberry. *Sci Rep* 6:29017.  
678 <https://doi.org/10.1038/srep29017>
- 679 Hawkins C, Caruana J, Li J, Zawora C, Darwish O, Wu J, Alkharouf N, Liu Z (2017) An eFP browser for  
680 visualizing strawberry fruit and flower transcriptomes. *Hortic Res* 4:17029.  
681 <https://doi.org/10.1038/hortres.2017.29>
- 682 Jaakola L (2013) New insights into the regulation of anthocyanin biosynthesis in fruits. *Trends Plant Sci*  
683 18:477-483. <https://doi.org/10.1016/j.tplants.2013.06.003>
- 684 Jaakola L, Poole M, Jones MO, Kämäräinen-Karppinen T, Koskimäki JJ, Hohtola A, Häggman H, Fraser  
685 PD, Manning K, King GJ, Thomson H, Seymour GB (2010) A SQUAMOSA MADS box gene involved in the  
686 regulation of anthocyanin accumulation in bilberry fruits. *Plant Physiol* 153:1619-1629.  
687 <https://doi.org/10.1104/pp.110.158279>
- 688 Jin J, Tian F, Yang DC, Meng YQ, Kong L, Luo J, Gao G (2017) PlantTFDB 4.0: toward a central hub for  
689 transcription factors and regulatory interactions in plants. *Nucleic Acids Res* 45:D1040-D1045.  
690 <https://doi.org/10.1093/nar/gkw982>
- 691 Jung S, Lee T, Cheng CH, Buble K, Zheng P, Yu J, Humann J, Ficklin SP, Gasic K, Scott K, Frank M, Ru S,  
692 Hough H, Evans K, Peace C, Olmstead M, DeVetter LW, McFerson J, Coe M, Wegrzyn JL, Staton ME, Abbott  
693 AG, Main D (2019) 15 years of GDR: New data and functionality in the Genome Database for Rosaceae.  
694 *Nucleic Acids Res* 47:D1137-D1145. <https://doi.org/10.1093/nar/gky1000>
- 695 Labadie M, Vallin G, Petit A, Ring L, Hoffmann T, Gaston A, Potier A, Schwab W, Rothan C, Denoyes B  
696 (2020) Metabolite Quantitative Trait Loci for flavonoids provide new insights into the genetic architecture

- 697 of strawberry (*Fragaria x ananassa*) fruit quality. *Journal of the Agricultural and Food Chemistry*.  
698 <https://doi.org/10.1021/acs.jafc.0c01855> Online ahead of print.
- 699 Lerceteau-Köhler E, Moing A, Guérin G, Renaud C, Petit A, Rothan C, Denoyes B (2012) Genetic  
700 dissection of fruit quality traits in the octoploid cultivated strawberry highlights the role of homoeo-QTL in  
701 their control. *Theor Appl Genet* 124:1059-1077. <https://doi.org/10.1007/s00122-011-1769-3>
- 702 Li Y, Pi M, Gao Q, Liu Z, Kang C (2019) Updated annotation of the wild strawberry *Fragaria vesca* V4  
703 genome. *Hortic Res* 6:61. <https://doi.org/10.1038/s41438-019-0142-6>
- 704 Liston A, Wei N, Tennesen JA, Li J, Dong M, Ashman TL (2020) Revisiting the origin of octoploid  
705 strawberry. *Nat Genet* 52:2-4. <https://doi.org/10.1038/s41588-019-0356-4>
- 706 Ma D, Constabel CP (2019) MYB Repressors as Regulators of Phenylpropanoid Metabolism in Plants.  
707 *Trends Plant Sci* 24:275-289. <https://doi.org/10.1016/j.tplants.2018.12.003>
- 708 Mezzetti B, Giampieri F, Zhang YT, Zhong CF (2018) Status of strawberry breeding programs and  
709 cultivation systems in Europe and the rest of the world. *J. Berry Res.* 8:205-221.
- 710 Miller K, Feucht W, Schmid M (2019) Bioactive compounds of strawberry and blueberry and their  
711 potential health effects based on human intervention studies: a brief overview. *Nutrients* 11:1510.  
712 <https://doi.org/10.3390/nu11071510>
- 713 Medina-Puche L, Cumplido-Laso G, Amil-Ruiz F, Hoffmann T, Ring L, Rodríguez-Franco A, Caballero JL,  
714 Schwab W, Muñoz-Blanco J, Blanco-Portales R. (2014) MYB10 plays a major role in the regulation of  
715 flavonoid/phenylpropanoid metabolism during ripening of *Fragaria x ananassa* fruits. *J Exp Bot* 65:401-417.  
716 doi: 10.1093/jxb/ert377
- 717 Muñoz C, Sánchez-Sevilla JF, Botella MA, Hoffmann T, Schwab W, Valpuesta V (2011) Polyphenol  
718 composition in the ripe fruits of *Fragaria* species and transcriptional analyses of key genes in the pathway. *J*  
719 *Agric Food Chem* 59:12598-12604. <https://pubs.acs.org/doi/10.1021/jf203965j>
- 720 Nesi N, Debeaujon I, Jond C, Stewart AJ, Jenkins GI, Caboche M, Lepiniec L (2002) The TRANSPARENT  
721 TESTA16 locus encodes the ARABIDOPSIS BSISTER MADS domain protein and is required for proper  
722 development and pigmentation of the seed coat. *Plant Cell* 14:2463-2479. doi: 10.1105/tpc.004127
- 723 Perrotte J, Gaston A, Potier A, Petit A, Rothan C, Denoyes B (2016) Narrowing down the single  
724 homoeologous FaPFRU locus controlling flowering in the cultivated octoploid strawberry using a selective  
725 mapping strategy. *Plant Biotechnology Journal* 14:2176-2189.
- 726 Ring L, Yeh SY, Hücherig S, Hoffmann T, Blanco-Portales R, Fouche M, Villatoro C, Denoyes B, Monfort  
727 A, Caballero JL, Muñoz-Blanco J, Gershenson J, Schwab W (2013) Metabolic interaction between  
728 anthocyanin and lignin biosynthesis is associated with peroxidase FaPRX27 in strawberry fruit. *Plant Physiol*  
729 163:43-60. <https://doi.org/10.1104/pp.113.222778>
- 730 Robinson JT, Thorvaldsdóttir H, Winckler W, Guttman M, Lander ES, Getz G, Mesirov JP (2011)  
731 Integrative genomics viewer. *Nat Biotechnol* 29:24-26. <https://doi.org/10.1038/nbt.1754>

- 732 Rousseau-Gueutin M, Lerceteau-Köhler E, Barrot L, Sargent DJ, Monfort A, Simpson D, Arús P, Guérin  
733 G, Denoyes-Rothan B (2008) Comparative genetic mapping between octoploid and diploid *Fragaria* species  
734 reveals a high level of colinearity between their genomes and the essentially disomic behavior of the  
735 cultivated octoploid strawberry. *Genetics* 179:2045-2060. <https://doi.org/10.1534/genetics.107.083840>
- 736 Roy S, Wu B, Liu W, Archbold DD (2018) Comparative analyses of polyphenolic composition of *Fragaria*  
737 spp. colour mutants. *Plant Physiol Biochem* 125:255-261. <https://doi.org/10.1016/j.plaphy.2018.02.003>
- 738 Salinas N, Verma S, Peres N, Whitaker VM (2019) FaRCa1: a major subgenome-specific locus conferring  
739 resistance to *Colletotrichum acutatum* in strawberry. *Theor Appl Genet.* 132:1109-1120.  
740 doi:10.1007/s00122-018-3263-7
- 741 Schaart JG, Dubos C, Romero De La Fuente I, van Houwelingen AM, de Vos RC, Jonker HH, Xu W,  
742 Routaboul JM, Lepiniec L, Bovy AG (2013) Identification and characterization of MYB-bHLH-WD40  
743 regulatory complexes controlling proanthocyanidin biosynthesis in strawberry (*Fragaria × ananassa*) fruits.  
744 *New Phytol* 197:454-467. doi: 10.1111/nph.12017.
- 745 Salvatierra A, Pimentel P, Moya-León MA, Herrera R (2013) Increased accumulation of anthocyanins in  
746 *Fragaria chiloensis* fruits by transient suppression of FcMYB1 gene. *Phytochemistry* 90:25–36.  
747 doi:10.1016/j.phytochem.2013.02.016
- 748 Scarano A, Butelli E, De Santis S, Cavalcanti E, Hill L, De Angelis M, Giovinazzo G, Chieppa M, Martin C,  
749 Santino A (2018) Combined dietary anthocyanins, flavonols, and stilbenoids alleviate inflammatory bowel  
750 disease symptoms in mice. *Front Nutr* 4:75. <https://doi.org/10.3389/fnut.2017.00075>
- 751 Shulaev V, Sargent DJ, Crowhurst RN et al (2011) The genome of woodland strawberry (*Fragaria*  
752 *vesca*). *Nat Genet* 43:109-116. <https://doi.org/10.1038/ng.740>
- 753 Spitzer-Rimon B, Marhevka E, Barkai O, Marton I, Edelbaum O, Masci T, Prathapani NK, Shklarman E,  
754 Ovadis M, Vainstein A (2010) EOBII, a gene encoding a flower-specific regulator of phenylpropanoid  
755 volatiles' biosynthesis in petunia. *Plant Cell* 22:1961–1976. doi:10.1105/tpc.109.067280
- 756 Tulipani S, Mezzetti B, Capocasa F, Bompadre S, Beekwilder J, de Vos CH, Capanoglu E, Bovy A, Battino  
757 M (2008) Antioxidants, phenolic compounds, and nutritional quality of different strawberry genotypes. *J*  
758 *Agric Food Chem* 56:696-704. <https://doi.org/10.1021/jf0719959>
- 759 Tulipani S, Mezzetti B, Battino M (2009) Impact of strawberries on human health: insight into  
760 marginally discussed bioactive compounds for the Mediterranean diet. *Public Health Nutr* 12:1656-1662.  
761 <https://doi.org/10.1017/S1368980009990516>
- 762 Urrutia M, Schwab W, Hoffmann T, Monfort A (2016) Genetic dissection of the (poly)phenol profile of  
763 diploid strawberry (*Fragaria vesca*) fruits using a NIL collection. *Plant Sci* 242:151-168.  
764 <https://doi.org/10.1016/j.plantsci.2015.07.019>
- 765 Van Ooijen JW (2011) Multipoint maximum likelihood mapping in a full-sib family of an outbreeding  
766 species. *Genet Res* 93:343-349. <https://doi.org/10.1017/S0016672311000279>

- 767 Voorrips RE (2002) MapChart: software for the graphical presentation of linkage maps and QTLs. J  
768 Hered. 93:77-78. doi: 10.1093/jhered/93.1.77
- 769 Wang R, Ming M, Li J, Shi D, Qiao X, Li L, Zhang S, Wu J (2017) Genome-wide identification of the  
770 MADS-box transcription factor family in pear (*Pyrus bretschneideri*) reveals evolution and functional  
771 divergence. PeerJ 5:e3776. doi: 10.7717/peerj.3776.
- 772 Wang H, Zhang H, Yang Y, Li M, Zhang Y, Liu J, Dong J, Li J, Butelli E, Xue Z, Wang A, Wang G, Martin C,  
773 Jin W (2020) The control of red colour by a family of MYB transcription factors in octoploid strawberry  
774 (*Fragaria × ananassa*) fruits. Plant Biotechnol J 8:1169-1184. 10.1111/pbi.13282.  
775 <https://doi.org/10.1111/pbi.13282>
- 776 Wickham H, Chang W, Henry L, Pedersen T.L, Takahashi K, Wilke C, Woo K, Yutani H (2019). ggplot2:  
777 Create Elegant Data Visualisations Using the Grammar of Graphics. R package version 3.2.1.  
778 <https://CRAN.R-project.org/package=ggplot2>
- 779 Winter AN, Ross EK, Wilkins HM, Stankiewicz TR, Wallace T, Miller K, Linseman DA (2018) An  
780 anthocyanin-enriched extract from strawberries delays disease onset and extends survival in the hSOD1<sup>G93A</sup>  
781 mouse model of amyotrophic lateral sclerosis. Nutr Neurosci 21:414-426.  
782 <https://doi.org/10.1080/1028415X.2017.1297023>
- 783 Zeng ZB (1993) Theoretical basis for separation of multiple linked gene effects in mapping quantitative  
784 trait loci. Proc Natl Acad Sci USA 90:10972-10976. <https://doi.org/10.1073/pnas.90.23.10972>
- 785 Zeng ZB (1994) Precision mapping of quantitative trait loci. Genetics 136:1457-1468.
- 786 Zhang J, Lei Y, Wang B, Li S, Yu S, Wang Y, Li H, Liu Y, Ma Y, Dai H, Wang J, Zhang Z (2020) The high-  
787 quality genome of diploid strawberry (*Fragaria nilgerrensis*) provides new insights into anthocyanin  
788 accumulation. Plant Biotechnol J. doi: 10.1111/pbi.13351. Epub ahead of print.
- 789 Zhao L, Jiang XL, Qian YM, Wang PQ, Xie DY, Gao LP, Xia T (2017) Metabolic Characterization of the  
790 Anthocyanidin Reductase Pathway Involved in the Biosynthesis of Flavan-3-ols in Elite Shuchazao Tea  
791 (*Camellia sinensis*) Cultivar in the Field. Molecules 22:2241. doi: 10.3390/molecules22122241.  
792  
793  
794  
795

796 **Figure legends**

797

798 **Figure 1. Flavonoids of strawberry (*Fragaria x ananassa*) fruit and their distribution in the progeny.**

799 **A)** Simplified flavonoid biosynthetic pathway. Compounds assessed in this study are in red. Chemical  
800 classes are in blue. ANR, anthocyanidin reductase; ANS, anthocyanidin synthase; CHI, chalcone  
801 isomerase; C4H, cinnamic acid-4-hydroxylase; 4CL, 4-coumarate:CoA ligase; CHS, chalcone synthase;  
802 DFR, dihydroflavonol-4-reductase; FGT, UDPglucose: flavonoid-3-O-glucosyltransferase; FHT/F3H,  
803 flavanone-3-hydroxylase; FLS, flavonol synthase; LAR, leucoanthocyanidin reductase; PAL, phenylalanine  
804 ammonia-lyase.

805 **B)** Distribution of the progeny mean in 2010. Mean phenotypic values from parents are represented in  
806 red for 'Capitola' and in blue for 'CF1116'. Ant, Fvo, F3ol values were obtained by summation of total  
807 anthocyanins, total flavonols and total flavan-3-ols, respectively; PgGs, Pelargonidin-3-glucoside;  
808 PgGsM, Pelargonidin-3-glucoside-malonate; PgRs, Pelargonidin-3-rutinoside; CyGs, Cyanidin-3-glucoside;  
809 AfPgGs, (epi)Afzelechin-pelargonidin-3-glucoside; KGs, Kaempferol-glucoside; KGn, Kaempferol-  
810 glucuronide; KCoGs, Kaempferol-coumaryl-glucoside; QGn, Quercetin-glucuronide; Cat, Catechin;  
811 CatCat, (epi)Catechin dimers; AfCat, (epi)Afzelechin-(epi)catechin dimers; AfGs, (epi)Afzelechin-  
812 glucoside; ANTHc, anthocyanins (colourimetry). The flavonoid metabolites values are expressed as mg-  
813 equ/100 g FW assuming a response factor of 1. ANTHc results are expressed as mg pelargonidin-3-  
814 glucoside equivalents/100 g FW.

815

816 **Figure 2. Contribution of the M3a and F6a QTLs to colour-related trait values.**

817 Effect of M3a and F6a localized alleles on PgGs content and COLOUR values. The allelic status (presence,  
818 H; absence, A) of the two markers, AX.89826440.M3a (M3a) and AX.89842368.F6a (F6a) is indicated on  
819 the abscissa. These markers were chosen because they were localized at the peak of colour-related QTLs  
820 (PgGs\_2010 and Colour\_2011) on M3a and F6a. Boxes represent the trait variation of individuals with  
821 the reported combination of alleles. Boxplots with the same letter are not significantly different  
822 (Kruskal-Wallis test,  $P < 0.05$ ).

823

824 **Figure 3. Localization of colour-related QTLs on the linkage groups M3a and F3a.**

825 **A)** Mapchart of linkage group LG3A. Linkage groups are represented in MapChart 2.3 (R. E. Voorrips,  
826 2002) with a space of 3mm per cM. Each boxplot corresponds to a QTL identified with a threshold of  
827 10%. Bayesian credible interval of QTL is indicated at 5%. Ant, total anthocyanins; PgGs, Pelargonidin-3-  
828 glucoside; COLOUR, visual evaluation of fruit colour. Each QTL name is preceded by the year (2010\_ or  
829 2011\_).



830 **B-D)** mQTL scans and effect of markers linked to Pelargonidin-3-glucoside (PgGs) and COLOUR  
831 (colourimetry) QTLs localized on linkage groups M3a (male) and F3a (female). For each of the three  
832 QTLs, genome scan (top), scan on specific linkage groups M3a or F3a (bottom left) and plot effect of the  
833 QTL marker (bottom right) are shown. Linkage groups M3a: (A) 2010\_PgGs; (B) 2011\_COLOUR and F3a:  
834 (C) 2011\_PgGs. For QTL genome scan and scan of specific linkage group, LOD values are shown on the y-  
835 axis and genetic positions in centiMorgans are on the x-axis. Simple and composite Interval mapping  
836 analysis (SIM and CIM) are represented by the purple solid and the dark green solid lines respectively.  
837 Threshold of QTL detection at 5% (red) and 10% (blue) for each trait is represented. In scan on specific  
838 linkage group, Bayesian credible interval of QTL is indicated at 5% in light green. For each QTL flanking  
839 markers, markers of QTL and variance ( $R^2$ ) are indicated. For each trait, effect of QTL is indicated at the  
840 marker corresponding to the maximal LOD value of QTL.

841

842 **Fig. 4. Expression of ANR and MYB102-like ODORANT in two extreme pools of individuals with**  
843 **contrasted pelargonidin-3-glucoside (PgGs) content.**

844 **A-B)** Two pools of seven individuals from the 'Capitola' and 'CF1116' progeny were constituted  
845 according to their PgGs content in 2010 (A) and 2011 (B). **C-D)** Microarray signal values (arbitrary units)  
846 are reported for ANR (*FvH4\_3g02980*) (C) and for MYB102-like ODORANT (*FvH4\_3g03780*) (D). Boxplots  
847 with different letters are significantly different (Kruskall-Wallis test,  $P < 0.05$ ).

848

849 **Fig. 5. Polymorphisms identified in the MYB102-like ODORANT and ANR genes underlying the LG3a**  
850 **colour-related QTLs by whole genome sequencing of the progeny parents.**

851 Schematic representation of the *MYB102-like ODORANT* (*FvH4\_3g03780*) and *ANR* (*FvH4\_3g02980*)  
852 genes was extracted from GDR (<https://www.rosaceae.org/>). Polymorphism was searched in *cis*-  
853 regulatory regions including promoter (~1000pb upstream of the 5'UTR), 5'UTR region and coding  
854 region (exons). Only polymorphisms between 'Capitola' (Cap) and 'CF1116' (CF) that respond to a Chi2  
855 test for the presence of 1 allele out of the 8 alleles (1:7 ratio) are reported. In red, polymorphisms with  
856 potential effect on expression or function. Type of polymorphisms are described: DEL, deletion; INS,  
857 insertion; SNP, single nucleotide polymorphism. syn. mut. for synonymous mutation. Three letter code is  
858 used for amino acid description. Numbers refer to positions on the Fvb3 release of the reference  
859 genome (*Fragaria vesca* Whole Genome v4.0.a1 Assembly; Edger et al. 2018).

860

861 **Online resource**

862

863 **Supplemental Figure 1. Colour score of ripe fruits.**

864 **Supplemental Figure 2.** Distribution in 2011 of the progeny mean for flavonoid metabolites, total  
865 anthocyanins assessed by colourimetry and colour assessed visually.

866 **Supplemental Figure 3.** Localization of all detected QTLs on male (A) and female (B) linkage maps for  
867 flavonoid metabolites, total anthocyanins assessed by colourimetry and colour assessed visually.

868

869 **Supplemental Table 1.** COLOUR trait values for ‘Capitola’ and ‘Capitola’ x ‘CF1116’ progeny in 2011.

870 **Supplemental Table 2.** Correspondence between names of linkage groups from female (‘Capitola’) and  
871 male (‘CF1116’) parents and the *F. vesca*, *F. viridis*, *F. iinumae* and *F. nipponica*–derived subgenomes.

872 **Supplemental Table 3.** Pointwise of male linkage map.

873 **Supplemental Table 4.** Pointwise of female linkage map.

874 **Supplemental Table 5.** Significant QTLs detected in male and female linkage maps for all traits and for  
875 two years based on CIM analysis with LOD > LOD threshold 5 and 10% for each trait.

876 **Supplemental Table 6.** Values of the thresholds at 5 and 10% used for CIM QTL analysis. The thresholds  
877 were calculated on 1000 permutations for each trait for male and female in 2010 and 2011.

878 **Supplemental Table 7.** List of genes from the FvH4\_v4.0.a2 version of the *Fragaria vesca* reference  
879 genome (Li et al. 2019) located in the male M3a colour-related QTLs.

880 **Supplemental Table 8.** Phenotypic data of the two sets of individual with extremes phenotypes for  
881 pelargonidin-3-glucoside that were studied using microarray.

882 **Supplemental Table 9.** List of genes included in the Bayesian credible interval of M3a colour-related  
883 QTLs that were tested by microarray.

**Table 1.** Distribution and number of significant QTLs detected for colour-related traits according to male and female linkage groups (LGs) and year.

| LGs            | Nb QTLs in 2010 | Nb QTLs in 2011 | Total Nb of QTLs | Nb regions with QTLs | QTLs located on a same linkage group <sup>a</sup>                                                                          |
|----------------|-----------------|-----------------|------------------|----------------------|----------------------------------------------------------------------------------------------------------------------------|
| M1a            |                 | 6               | 6                | 3                    | M_2011_COLOUR/2011_AfPgGs;<br>M_2011_Ant/2011_PgGs/2011_PgRs;<br>M_2011_ANTHc                                              |
| M1c            |                 | 1               | 1                | 1                    | M_2011_PgGsM                                                                                                               |
| M2a/F2a        | 2               | 1               | 3                | 2                    | M_2011_AfPgGs; F_2010_Ant/2010_PgGs                                                                                        |
| <b>M3a/F3a</b> | <b>2</b>        | <b>3</b>        | <b>5</b>         | <b>1</b>             | <b>M_2011_COLOUR/2010_Ant/2010_PgGs/F_2011_Ant/2011_PgGs</b>                                                               |
| F3b            |                 | 1               | 1                | 1                    | F_2011_PgGs                                                                                                                |
| M4a            | 1               |                 | 1                | 1                    | M_2010_ANTHc                                                                                                               |
| M4d/F4d        |                 | 2               | 2                | 2                    | M_2011_PgGs; F_2011_COLOUR                                                                                                 |
| M5a            |                 | 1               | 1                | 1                    | M_2011_PgRs                                                                                                                |
| M5b            |                 | 1               | 1                | 1                    | M_2011_PgRs                                                                                                                |
| M6a/F6a        | 2               | 8               | 10               | 5                    | M_2011_PgRs; M_2011_ANTHc;<br>F_2010_Ant/2010_PgGs/2011_COLOUR/2011_CyGs;<br>F_2011_Ant/2011_ANTHc/2011_PgGs; F_2011_PgGsM |
| M6b/F6b        |                 | 2               | 2                | 2                    | M_2011_PgRs; F_2011_AfPgGs                                                                                                 |
| M6d            |                 | 1               | 1                | 1                    | M_2011_PgRs                                                                                                                |
| M7a            |                 | 1               | 1                | 1                    | M_2011_PgRs                                                                                                                |
| M7d            |                 | 1               | 1                | 1                    | M_2011_PgRs                                                                                                                |
| M41            |                 | 1               | 1                | 1                    | M_2011_PgRs                                                                                                                |
| <b>Total</b>   | <b>7</b>        | <b>30</b>       | <b>37</b>        | <b>24</b>            |                                                                                                                            |

Colour-related traits considered: anthocyanins measured by LC-ESI-MS (Ant, PgGs, PgGsM, PgRs, GyGs, AfPgGs); total anthocyanins measured by colourimetry (ANTHc); and colour assessed visually (COLOUR). QTLs were identified using CIM analysis with LOD > LOD threshold at 10%. In bold, LG3a QTLs further investigated.

<sup>a</sup>QTLs overlapping within a given LG are separated by a slash (/). QTLs found on different regions within a given LG are separated by a semicolon (;). mQTLs are underlined.

**Table 2.** Distribution of significant anthocyanin mQTLs and visually assessed COLOUR QTL in male (M) and female (F) linkage maps.

| Traits                                 | Abbr.  | Nb of QTLs | Location of QTLs on linkage groups (years)                                                        |
|----------------------------------------|--------|------------|---------------------------------------------------------------------------------------------------|
| <b>Anthocyanins</b>                    |        |            |                                                                                                   |
| Total anthocyanins                     | Ant    | 6          | M1a(2011), F2a(2010), M3a(2010), F3a(2011), F6a(2010 & 2011)                                      |
| Pelargonidin-3-glucoside               | PgGs   | 8          | M1a(2011), F2a(2010), M3a(2010), F3a(2011), F3b(2011), M4d(2011), F6a(2010 & 2011)                |
| Pelargonidin-3-glucoside-malonate      | PgGsM  | 2          | M1c(2011), F6a(2011)                                                                              |
| Pelargonidin-3-rutinoside              | PgRs   | 9          | M1a(2011), M4l(2011), M5a(2011), M5b(2011), M6a(2011), M6b(2011), M6d(2011), M7a(2011), M7d(2011) |
| Cyanidin-3-glucoside                   | CyGs   | 1          | F6a(2011)                                                                                         |
| (epi)Afzelechin-pelargonidin-glucoside | AfPgGs | 3          | M1a(2011), M2a(2011), F6b(2011)                                                                   |
| <b>Colourimetry</b>                    |        |            |                                                                                                   |
| Anthocyanins (colourimetry)            | ANTHc  | 4          | M1a(2011), M4a(2010), M6a(2011), F6a(2011)                                                        |
| <b>Visual assessment</b>               |        |            |                                                                                                   |
| Colour                                 | COLOUR | 4          | M1a(2011), M3a(2011), F4d(2011), F6a(2011)                                                        |

QTLs were identified using CIM analysis with LOD > LOD threshold at 10%.

A

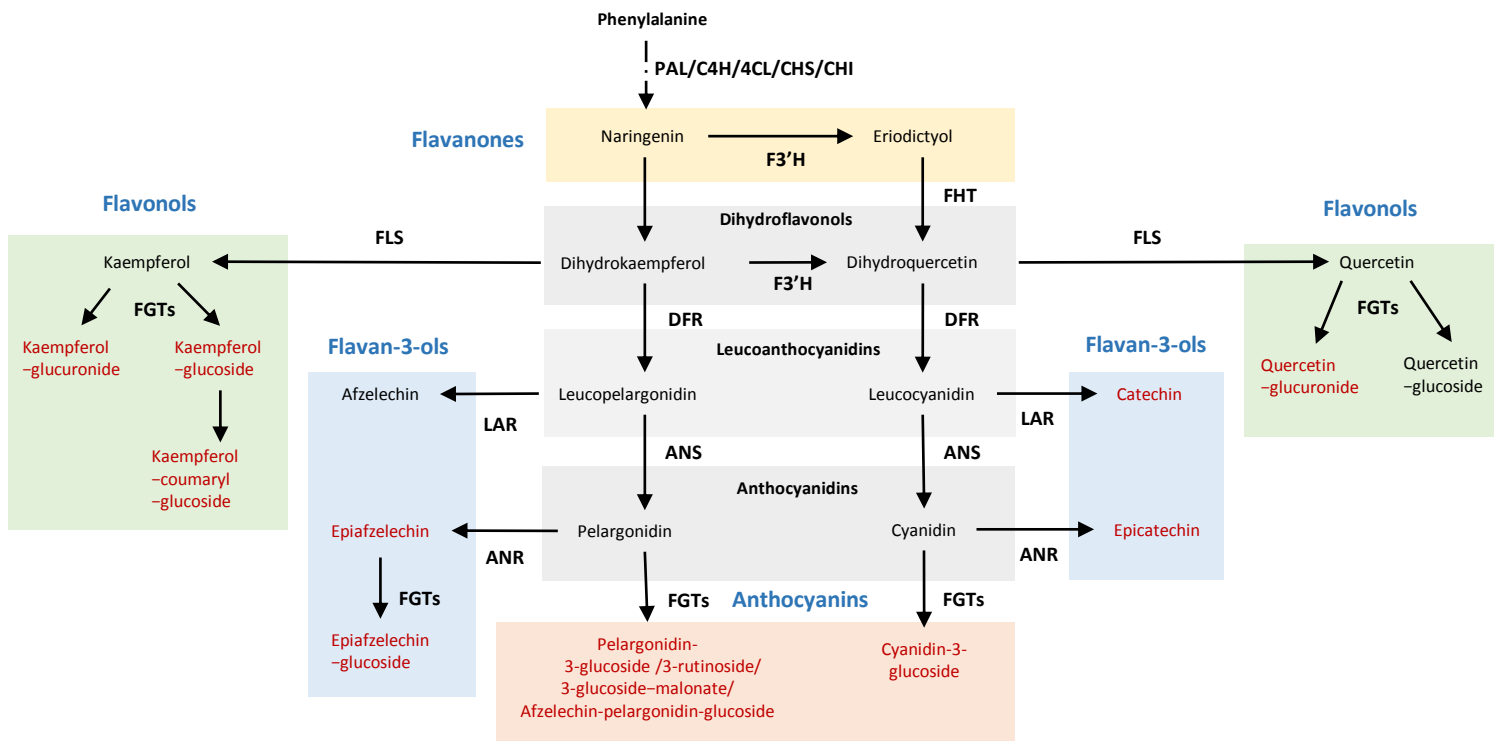

B

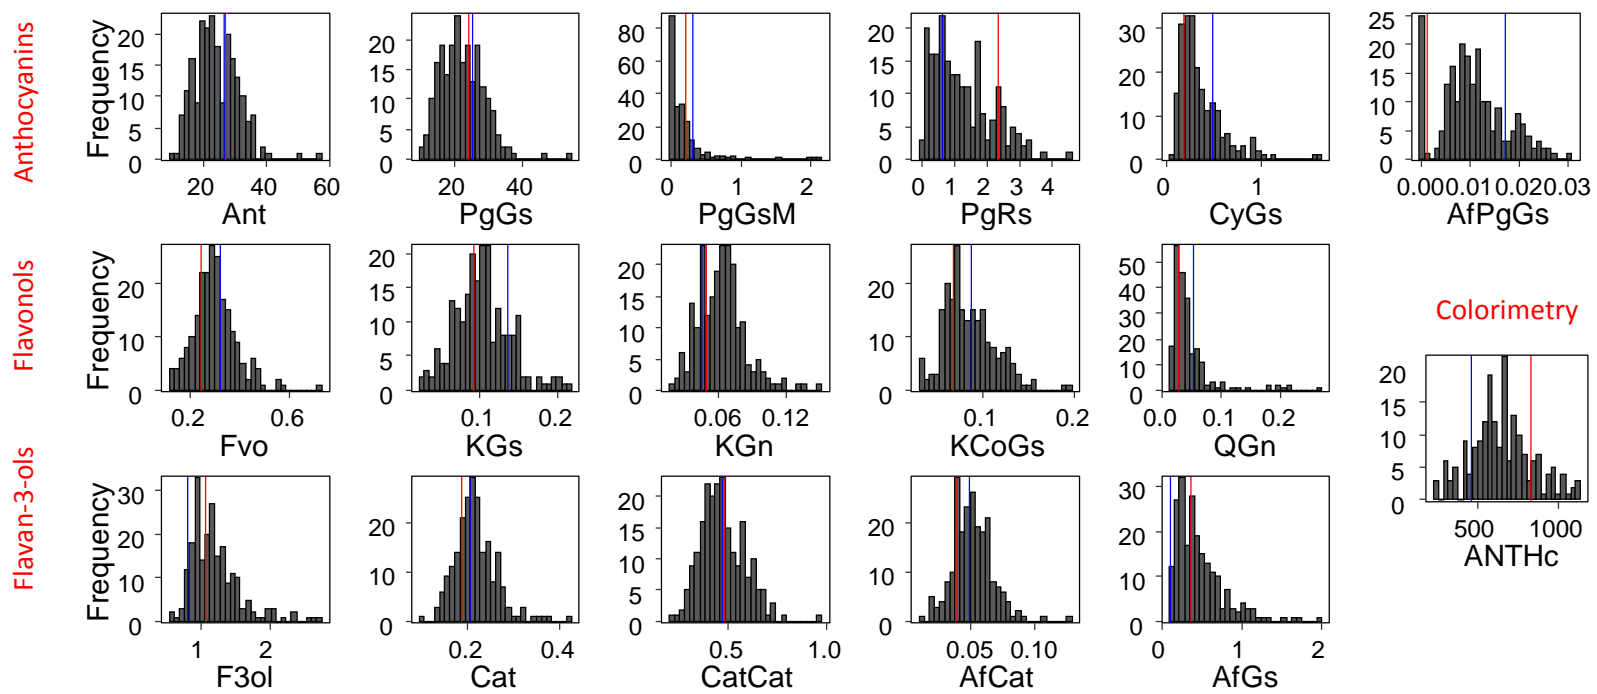

**Figure 1. Flavonoids of strawberry (*Fragaria x ananassa*) fruit and their distribution in the progeny.**

**A)** Simplified flavonoid biosynthetic pathway. Compounds assessed in this study are in red. Chemical classes are in blue. ANR, anthocyanidin reductase; ANS, anthocyanidin synthase; CHI, chalcone isomerase; C4H, cinnamic acid-4-hydroxylase; 4CL, 4-coumarate:CoA ligase; CHS, chalcone synthase; DFR, dihydroflavonol-4-reductase; FGT, UDPglucose: flavonoid-3-O-glucosyltransferase; FHT/F3H, flavanone-3-hydroxylase; FLS, flavonol synthase; LAR, leucoanthocyanidin reductase; PAL, phenylalanine ammonia-lyase.

**B)** Distribution of the progeny mean in 2010. Mean phenotypic values from parents are represented in red for 'Capitola' and in blue for 'CF1116'. Ant, Fvo, F3ol values were obtained by summation of total anthocyanins, total flavonols and total flavan-3-ols, respectively; PgGs, Pelargonidin-3-glucoside; PgGsM, Pelargonidin-3-glucoside-malonate; PGRs, Pelargonidin-3-rutinoside; CyGs, Cyanidin-3-glucoside; AfPgGs, (epi)Afzelechin-pelargonidin-3-glucoside; KGs, Kaempferol-glucoside; KGn, Kaempferol-glucuronide; KCoGs, Kaempferol-coumaryl-glucoside; QGn, Quercetin-glucuronide; Cat, Catechin; CatCat, (epi)Catechin dimers; AfCat, (epi)Afzelechin-(epi)catechin dimers; AfGs, (epi)Afzelechin-glucoside; ANTHc, anthocyanins (colourimetry). The flavonoid metabolites values are expressed as mg-equ/100 g FW assuming a response factor of 1. ANTHc results are expressed as mg pelargonidin-3-glucoside equivalents/100 g FW.

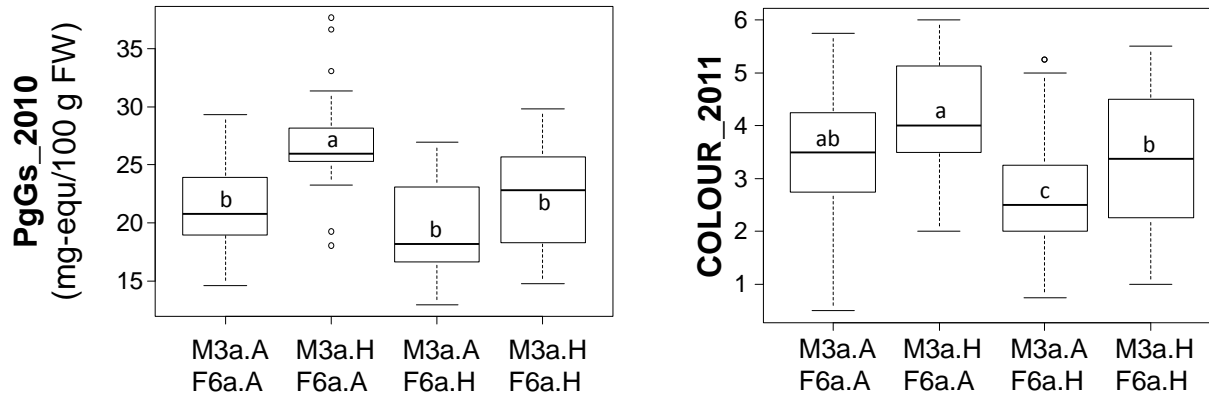

**Figure 2. Contribution of the M3a and F6a QTLs to colour-related trait values.**

Effect of M3a and F6a localized alleles on PgGs content and COLOUR values. The allelic status (presence, H; absence, A) of the two markers, AX.89826440.M3a (M3a) and AX.89842368.F6a (F6a) is indicated on the abscissa. These markers were chosen because they were localized at the peak of colour-related QTLs (PgGs\_2010 and Colour\_2011) on M3a and F6a. Boxes represent the trait variation of individuals with the reported combination of alleles. Boxplots with the same letter are not significantly different (Kruskal-Wallis test,  $P < 0.05$ ).

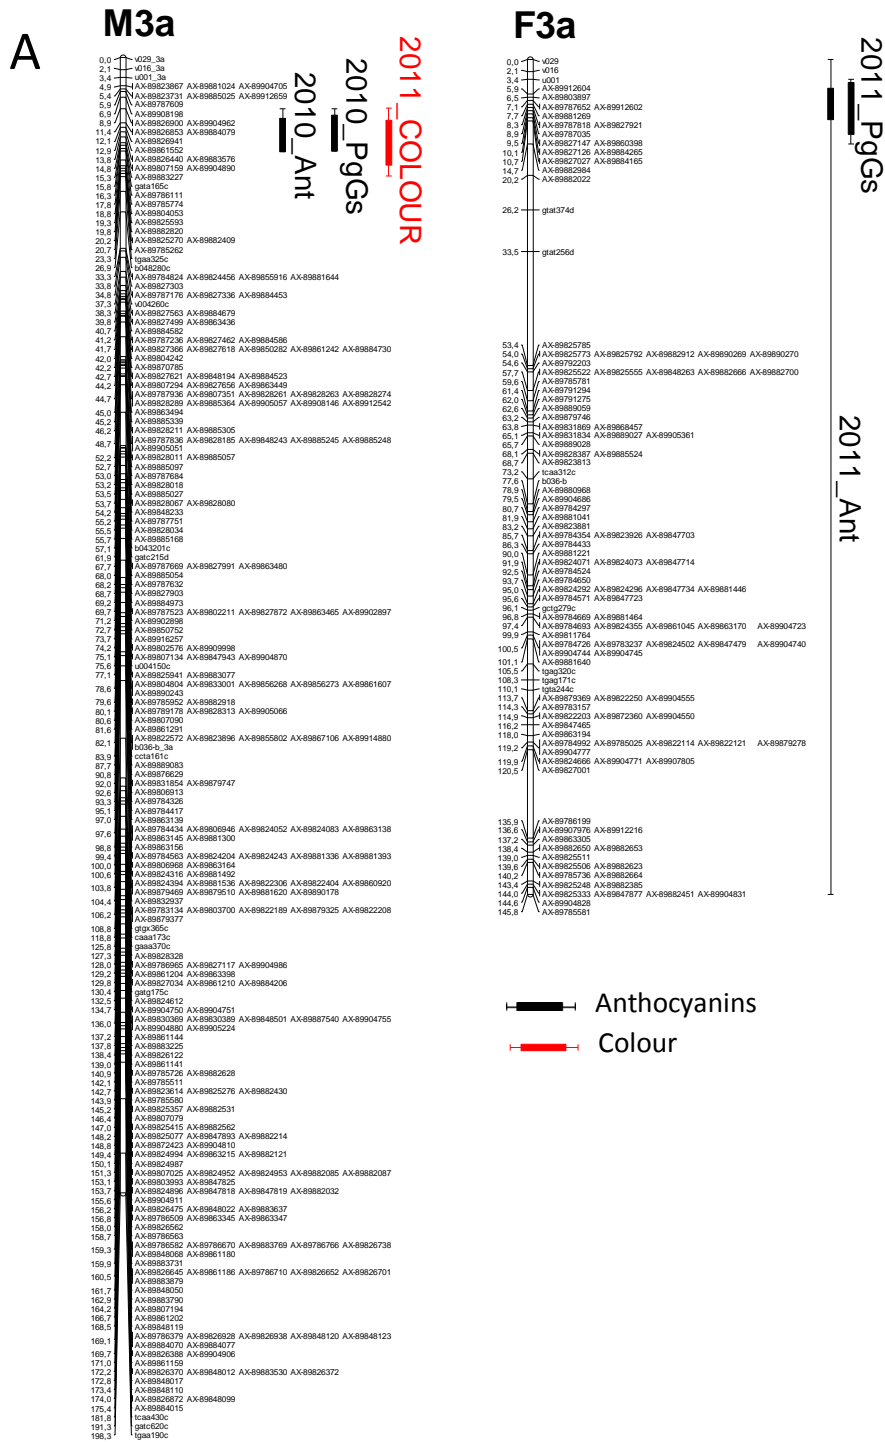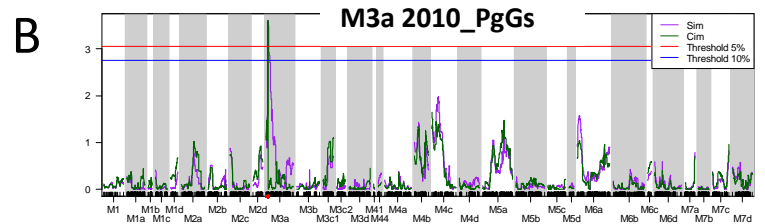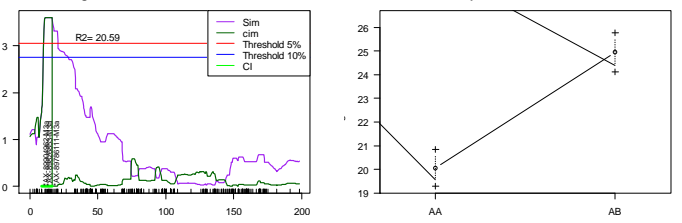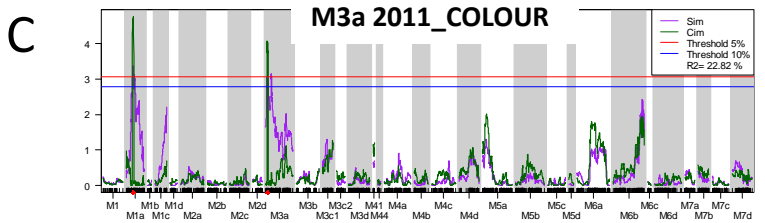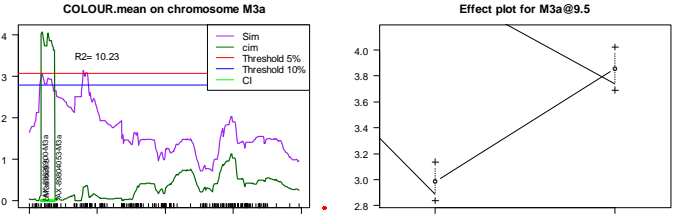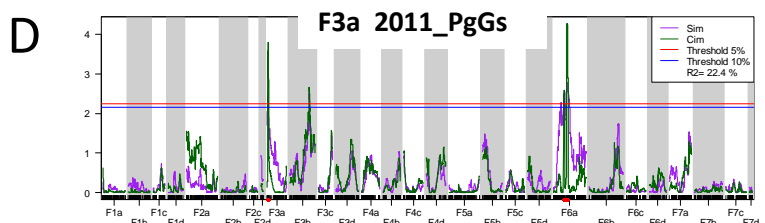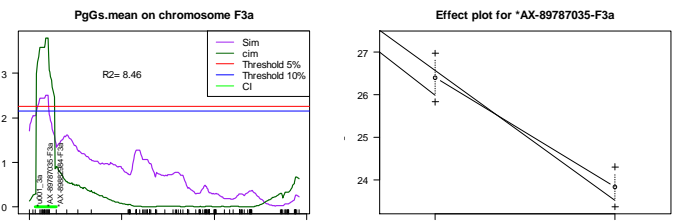



**Figure 3. Localization of colour-related QTLs on the linkage groups M3a and F3a.**

**A)** Mapchart of linkage group LG3A. Linkage groups are represented in MapChart 2.3 (R. E. Voorrips, 2002) with a space of 3mm per cM. Each boxplot corresponds to a QTL identified with a threshold of 10%. Bayesian credible interval of QTL is indicated at 5%. Ant, total anthocyanins; PgGs, Pelargonidin-3-glucoside; COLOUR, visual evaluation of fruit colour. Each QTL name is preceded by the year (2010\_ or 2011\_).

**B-D)** mQTL scans and effect of markers linked to Pelargonidin-3-glucoside (PgGs) and COLOUR (colourimetry) QTLs localized on linkage groups M3a (male) and F3a (female). For each of the three QTLs, genome scan (top), scan on specific linkage groups M3a or F3a (bottom left) and plot effect of the QTL marker (bottom right) are shown. Linkage groups M3a: (A) 2010\_PgGs; (B) 2011\_COLOUR and F3a: (C) 2011\_PgGs. For QTL genome scan and scan of specific linkage group, LOD values are shown on the y-axis and genetic positions in centiMorgans are on the x-axis. Simple and composite Interval mapping analysis (SIM and CIM) are represented by the purple solid and the dark green solid lines respectively. Threshold of QTL detection at 5% (red) and 10% (blue) for each trait is represented. In scan on specific linkage group, Bayesian credible interval of QTL is indicated at 5% in light green. For each QTL flanking markers, markers of QTL and variance ( $R^2$ ) are indicated. For each trait, effect of QTL is indicated at the marker corresponding to the maximal LOD value of QTL.

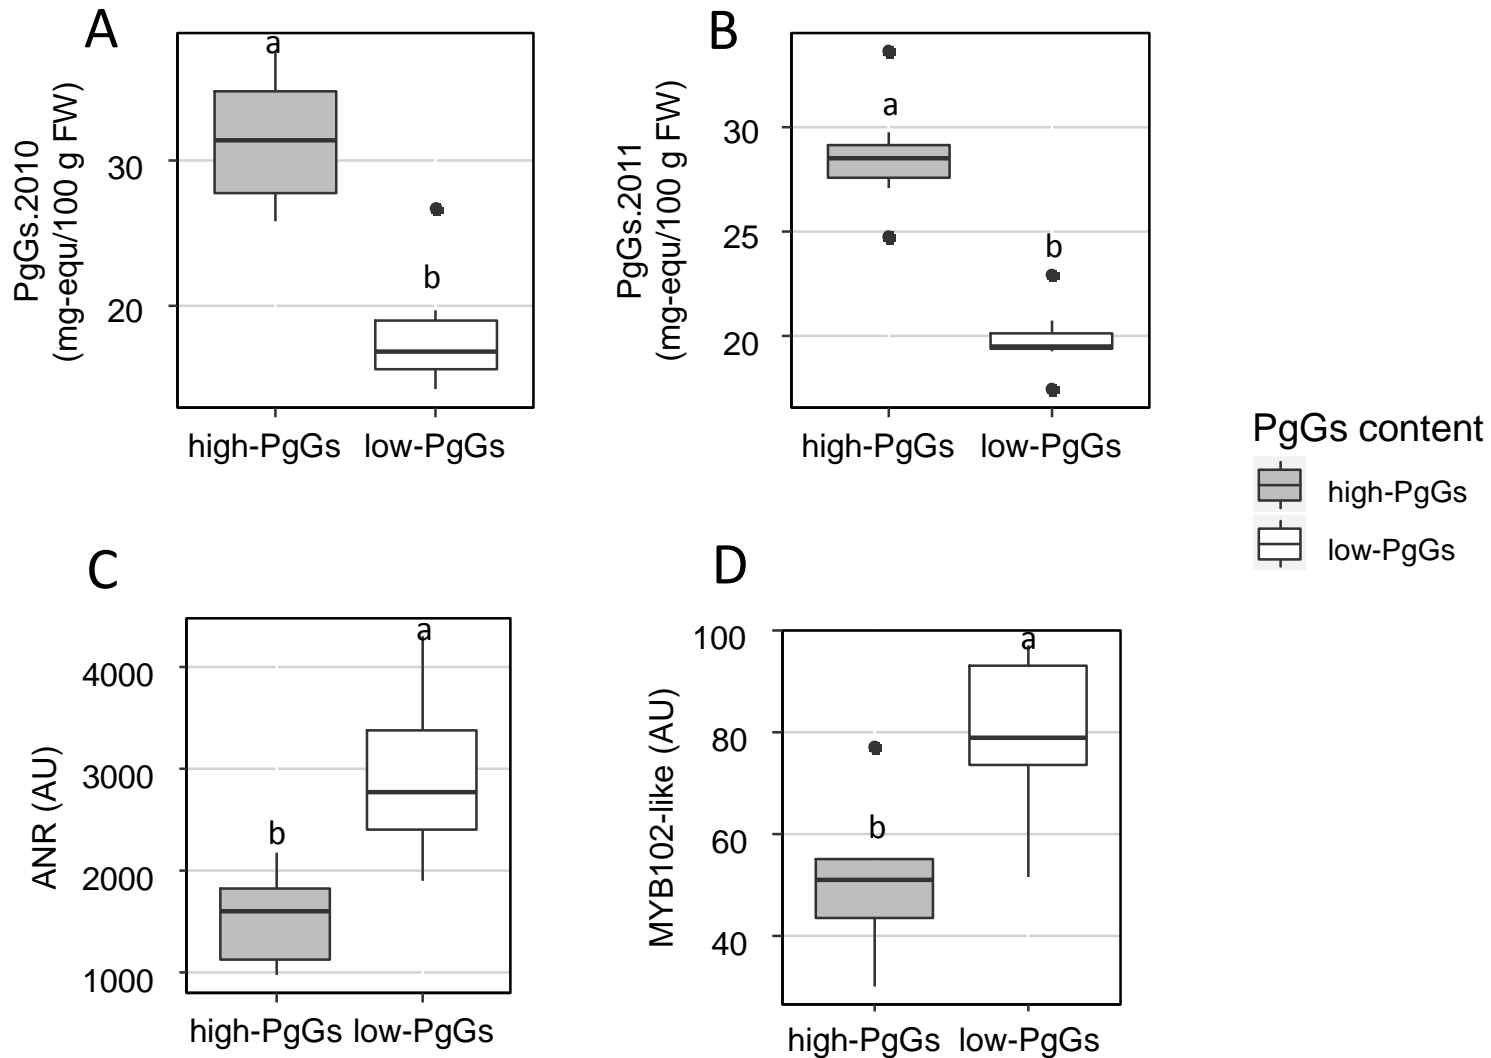

**Fig. 4. Expression of *ANR* and *MYB102-like ODORANT* in two extreme pools of individuals with contrasted pelargonidin-3-glucoside (PgGs) content.**

**A-B)** Two pools of seven individuals from the ‘Capitola’ and ‘CF1116’ progeny were constituted according to their PgGs content in 2010 (A) and 2011 (B). **C-D)** Microarray signal values (arbitrary units) are reported for *ANR* (*FvH4\_3g02980*) (C) and for *MYB102-like ODORANT* (*FvH4\_3g03780*) (D). Boxplots with different letters are significantly different (Kruskall-Wallis test,  $P < 0.05$ ).

# ANR

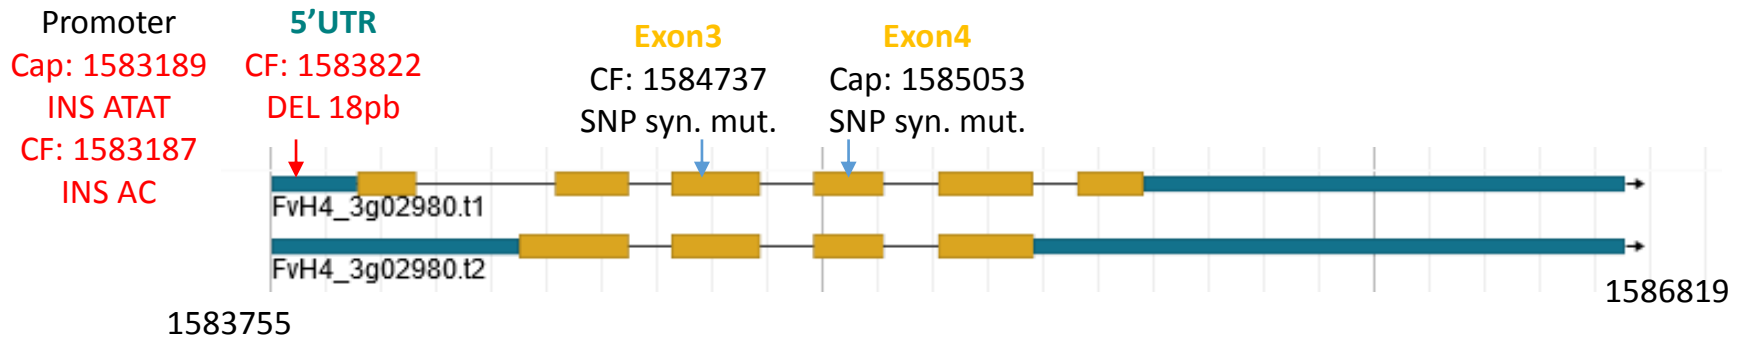

# MYB102-like ODORANT

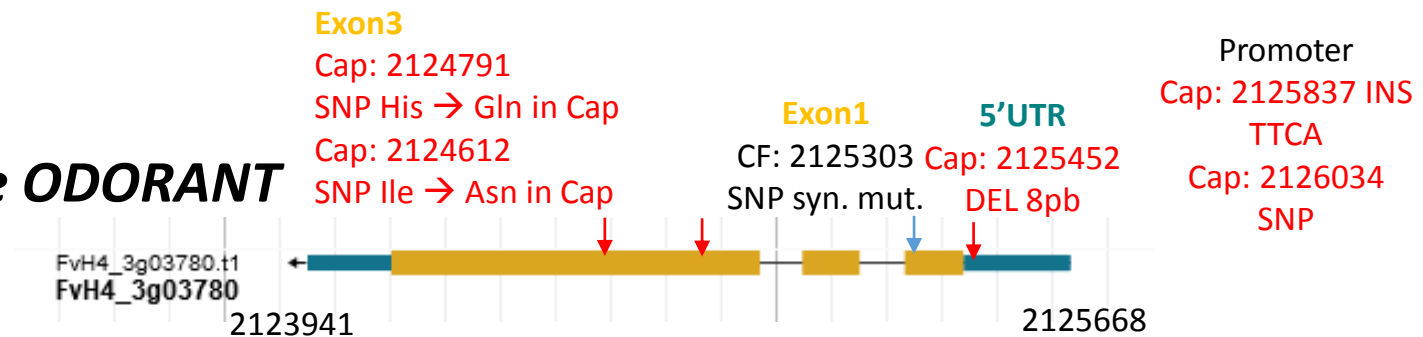

Fig. 5. Polymorphisms identified in the *MYB102-like ODORANT* and *ANR* genes underlying the LG3a colour-related QTLs by whole genome sequencing of the progeny parents.

Schematic representation of the *MYB102-like ODORANT* (*FvH4\_3g03780*) and *ANR* (*FvH4\_3g02980*) genes was extracted from GDR (<https://www.rosaceae.org/>). Polymorphism was searched in *cis*-regulatory regions including promoter (~1000pb upstream of the 5'UTR), 5'UTR region and coding region (exons). Only polymorphisms between 'Capitola' (Cap) and 'CF1116' (CF) that respond to a Chi2 test for the presence of 1 allele out of the 8 alleles (1:7 ratio) are reported. In red, polymorphisms with potential effect on expression or function. Type of polymorphisms are described: DEL, deletion; INS, insertion; SNP, single nucleotide polymorphism. syn. mut. for synonymous mutation. Three letter code is used for amino acid description. Numbers refer to positions on the Fvb3 release of the reference genome (*Fragaria vesca* Whole Genome v4.0.a1 Assembly; Edger et al. 2018).
